# Supplementary material for: HOXA1 and TALE proteins display cross-regulatory interactions and form a combinatorial binding code on HOXA1 targets
Source: HighWire-hosted journal article supplement (doi:10.1101/gr.219386.116), 2017-08-07
Supplement: Supplemental_information.docx [file Supplemental_information.docx]

**Supplementary Information for article:**

**HOXA1 and TALE proteins display cross-regulatory interactions and form a combinatorial binding code on HOXA1 targets**

Bony De Kumar, Hugo J. Parker, Ariel Paulson, Mark E. Parrish, Irina Pushel, Narendra Pratap Singh, Ying Zhang, Brian D. Slaughter, Jay R. Unruh, Laurence Florens, Julia Zeitlinger and Robb Krumlauf

**Supplementary data includes: 5 supplementary figures & 12 Supplementary tables**

**Supplemental Fig. S1**. Analysis of levels of epitope tagged *Hoxa1* mRNA and protein. (**A**) Western blot analysis of a time course showing expression of epitope tagged HOXA1 protein from 6 hours to 48 hours of differentiation (+dox +RA). (**B, C, D**) Quantitation of *Hoxa1* mRNA levels in ES cells and differentiated cells using (**B**) single molecule FISH (**C**) qPCR (**D**) RNA-Seq. KH2 notes the original ES cell line while KH2:*Hoxa1* is a variant of this ES line carrying a Dox inducible epitope-tagged version of *Hoxa1*.

**Supplemental Fig. S2**. HOXA1 binds with higher fold enrichment in differentiated cells compared with ES cells. **(A)** Density line graph showing distribution of fold enrichment of HOXA1 binding in ES cells (blue) and differentiated cells (red). An average higher fold enrichment is observed of HOXA1 binding in differentiated cells. **(B)** Peaks are arranged from higher to lower rank based on decreasing fold change. Binding regions in ES cells are represented as blue dots and differentiated cells in red. The shaded area represents the highest ranking peaks which are primarily composed of peaks from differentiated cells. (**C**) Fold enrichment of HOX-PBX bipartite motif in HOXA1 bound regions from ES cells and differentiated cells. Percentage of peaks are shown within parenthesis.

**Supplemental Fig. S3.** Quantification of *TALE* gene expression in ES cells and differentiated cells. (**A**) Absolute quantification of *TALE* transcripts using RNA-seq. Data for ES cells (blue) and differentiated cells (red) after 24 hours RA treatment are shown with the Y-Axis representing FPKM values. (**B**) Relative quantification of *TALE* transcripts in ES and differentiated cells using qPCR. Fold induction of *TALE* transcripts are shown on the Y-axis. (**C**) Induction kinetics of *Pbx1*, *Meis1, 2* and *3* during a 60 hr time course of RA induced differentiation measured by qPCR. Y-axis shows fold induction compared to ES cells and the X-axis indicates hours of RA treatment. **(D)** Quantitative analysis of *Hoxa1* and (**E**) *TALE* gene mRNA levels after 24 hours of RA treatment of three independent *Hoxa1+/-* cell lines. Y-axis shows fold change compared to housekeeping genes *Ubc* and *B2M*. In case of *Hoxa1*, two different primer sets were used to quantify levels of exon1 and exon2 separately. Each point in the graph is an average of nine values (three biological replicates and their corresponding technical triplicate).

**Supplemental Fig. S4.** KEGG pathway analysis of enrichment in the 8 TALE binding clusters. Signaling pathways are enriched and display overlapping and unique combinations in each cluster. Cluster 7 has no enriched KEGG pathways. The clusters with enrichments for Hippo (red), Hedgehog (blue) and Wnt (green) signaling are highlighted by stars at the right.

**Supplemental Fig. S5.**  Binding of *TALE* loci in differentiated mES cells and regulatory analysis in zebrafish. (**A-C**) UCSC browser shots of *Meis1* (**A**), *Pbx1* (**B**) and *TGIF* (**C**) showing HOXA1 bound regions (ChIP-seq and ChIP-nexus) along with occupancy of PBX and MEIS cofactors, activator protein EP300 and open chromatin states are shown. The shaded area indicates bound regions. Adjacent to each browser shot at the right are transgenic reporter assays illustrating the regulatory potential of the binding regions +/- 250 bp. Genomic coordinates (mm10) are indicated at the bottom. Position of otic vesicle (OV) is marked by a white circle.

**Supplemental Table S1** HOXA1 peak list in ES cells (+dox). List of genomic coordinates identified as HOXA1 bound region showing consistency in occupancy between two independent experiments.

**Supplemental Table S2** HOXA1 peak list for differentiated cells (+Dox+RA). List of genomic coordinates identified as HOXA1 bound region showing consistency in occupancy between two independent experiments.

**Supplemental Table S3** Enriched motifs from HOXA1 bound regions identified from ChIP-seq in ES cells. HOMER was used to analyze motif enrichment from HOXA1 bound regions. Motif logo and p-value is shown.

**Supplemental Table S4** Enriched motifs from HOXA1 bound regions identified from ChIP-seq in differentiated cells. HOMER was used to analyze motif enrichment from HOXA1 bound regions. Motif logo and p-value is shown.

**Supplemental Table S5** TALE proteins peak list in differentiated cells. List of genomic coordinates identified as PBX, MEIS, TGIF, PREP1 and PREP1 bound region showing consistency in occupancy (< 0.01 IDR) between two independent experiments.

**Supplemental Table S6** Enriched motifs from TALE protein bound regions identified from ChIP-seq in differentiated cells. HOMER was used to analyze motif enrichment from HOXA1 bound regions. Motif logo and p-value is shown.

**Supplemental Table S7** Enriched motifs from HOXA1 bound regions identified from ChIP-nexus in differentiated cells. HOMER was used to analyze motif enrichment from HOXA1 bound regions. Motif logo and p-value is shown.

**Supplemental Table S8** MudPIT analysis for TALE proteins immuno-precipitated with HOXA1 from chromatin bound protein complexes. Table shows peptides detected. Spectral counts, sequence coverage and distributed normalized spectral abundance factor (dNSAF) values for four experimental and four control runs.

**Supplemental Table S9** Enriched novel and known consensus TALE motifs in regions bound by one or more TALE proteins in differentiated cells. p-value indicates enrichment of corresponding motifs in respective TALE data.

**Supplemental Table S10** Enriched motifs from various clusters of combinatorial binding of HOXA1 and TALE bound regions identified from ChIP-seq in differentiated cells. HOMER was used to analyze motif enrichment from HOXA1 bound regions. Motif logo and p-value is shown.

**Supplemental Table S11** Details of the numbers of embryos injected and the efficiency of reporter expression for enhancer assays in zebrafish. Putative enhancer elements tested by reporter assay in this study are listed, along with their genomic co-ordinates in the mouse genome assembly (version mm10) and the names of their associated genes. For each element, the number and proportion of screened 30-36hpf zebrafish embryos displaying GFP expression in specific domains are given. N/A, numbers not available.

**Supplemental Table S12** Quantitative analysis of *Hoxa1* and *TALE* mRNA levels in Wildtype (Wt) and *Hoxa1+/-* ES cell lines after 24 hours of RA treatment. Raw Ct values were statistically analyzed qBASE++ version 2.1. Row Ct values were normalized using two housekeeping controls namely *B2M* and *Ubc*. All experiments were done with three biological replicates and with three technical replicates. The three independent *Hoxa1+/-* cell lines were each used as biological replicates.

**Extended Methods**

**Feeder free culture of KH2 ES cells**

KH2 ES cells (Beard et al., 2006) were grown in feeder free condition using N2B27+2i media supplemented with 2000 U/ml of ESGRO (Millipore). N2B27+2i media consist of neurobasal media (21103-049, Invitrogen), DMEM/F12 media (10565-018, Invitrogen), 0.5X N2 (17502-048, Invitrogen), 1X B27 (17504044, Invitrogen),1X β-mercaptoethanol (ES-007-E, Millipore), 1X Glutamax (10378-016) ,1X NEAA (07600, SCT), 3µM CHIR99021 (4423, Tocris), PD0325901 (72184, SCT), 0.033% BSA (15260037) Thermo Fisher scientific) (Qi-Long, 2008). Cells were seeded on gelatinized plate without a feeder layer. After 48hrs the media was changed to differentiation media (DMEM + 10% Serum + NEAA+ 3.3 µM RA + 0.5g/ml doxycycline) for 24 hours. Uninduced ES cells were grown in N2B27+2i up to 80-90% confluency.

**Generation of epitope tagged HOXA1 cell line**

Constructs with *Hoxa1-triple Flag-Myc* were generated in pBS31 using a recombineering approach. KH2 ES cells were engineered through lipofection and *Hoxa1-*triple flag-Myc were inserted in the *Col1A1* locus and put under control of a doxycycline inducible promoter. All cell lines were tested for karyotype stability. FACS Calibur was used for analysis of DNA content and to get indirect inference of karyotype stability. Cells were induced with RA and doxycycline and induction was confirmed through Western blot.

**Analysis of *Hoxa1* using single molecule FISH**

Epitope tagged *Hoxa1* ES cell line cell induced with Doxycycline alone (+Dox-RA) and with Doxycycline +RA (+Dox+RA) for 24hours. Uninduced ES cells were used as negative control. Single molecule FISH using stellaris probes (LGC Biosearch technologies) were performed and analyzed as previously described by De Kumar and coworkers (De Kumar et al., 2015).

**Western Analysis**

KH2 mouse ES cells bearing a Flag and Myc epitope tagged mouse *Hoxa1* gene (*Hoxa1*-3xFlag-Myc) were plated onto PMEF-HL feeder pre-seeded T25 flasks. After 24hr of growth Doxycycline was added to the media change. Cells were harvested at various time points by TrypLE enzymatic digestion and centrifugation, washed in PBS and stored at -80⁰C. Cells were then lysed in lysis buffer (20 mM HEPES, pH 7.9, 1.5 mM MgCl2, 0.5M NaCl, 0.2% Triton X-100, 10 mM KCl, 10% glycerol, + 0.5 mM DTT fresh 0.5 mM DTT protease inhibitors (P8340 Sigma Aldrich)) while rocking at 4⁰C for 1hr. Lysate were mixed with 4x loading buffer (Novex) and incubated at 95⁰C for 5 min. Samples were then subjected to electrophoresis using Novex pre-cast gels and XCell4 Surelock apparatus from Invitrogen. Electrophoresis was done running buffer (50 mM MES, 50 mM Tris Base, 0.1% SDS, 1 mM EDTA, pH 7.3) at 100V for 2hr at room temp. Gels were transferred to Protran nitrocellulose membranes in a New Idea vertical transfer apparatus at 12V for 1hr in Towbin buffer (25 mM Tris, 192 mM glycine, pH 8.3, 20% methanol). Blots were then blocked for 1hr at room temp in TBST (25 mM Tris-HCl, pH 7.4, 135 mM NaCl, 2.7mM KCl, 0.1% Tween 20) + 5% BioRad Blocker. Blots were then incubated rocking over night at 4⁰C with Sigma Aldrich mouse anti-flag antibody (F1804) 1/1000. Blots were subsequently washed rocking 4 times for 5 minutes in TBST followed by secondary antibody incubation. Secondary antibody incubations were done in TBST + 5% BioRad blocker using Goat anti-mouse secondary Alexa fleur 680 and 1/50,000 (Thermo Fisher A21058). Samples were protected from light during Secondary antibody incubation and subsequent washing steps. After secondary antibody incubation blots were washed rocking 4 times for 5 minutes in TBST. After a final wash for 15 minutes in TBS blots were imaged on a Li-Cor Odyssey imager. Image capture and analysis was done in Image Studio, ImageQuant and Odyssey software.

**ChIP and ChIP-Nexus**

Epitope tagged HOXA1 KH2 ES cells were differentiated with doxycycline and retinoic acid for 24 hours. ChIP was performed according to the Upstate protocol described in (Smith et al., 2010) with certain modifications. Cells were fixed by adding formaldehyde to media at a final concentration of 1% and by incubating at 37oC for 11 min and stopped by 1/10 volume of 1.25 M glycine with incubation at room temperature for 5 min. Cells were sonicated for 25 min in Bioruptor at high setting and 30 secs on-off cycle. Anti-Flag M2 antibody (Sigma Aldrich, F1804) with sepharose -A beads were used for IP. For ChIP nexus, Anti-Flag M2 antibody (Sigma Aldrich, F1804) was attached with Dynabeads (200 l per reaction) and the protocol performed as described by He Q and coworkers (He et al., 2015).

ChIP-seq and ChIP-nexus libraries were sequenced on the Illumina HiSeq 2500, 51bp single-end. Raw reads were aligned to the UCSC mm10 mouse genome with bowtie2 2.2.0 (Langmead and Salzberg, 2012). Primary reads from each bam were normalized to reads-per-million and bigWig tracks visualized at the UCSC genome browser (https://genome.ucsc.edu/). Peaks were called with MACS2 2.1.0.20140616 (Zhang et al., 2008), parameters “-g mm -p 0.25 –m 5 50”. From each replicate, top 100,000 peaks based on p-value were compared with IDR 1.7.0 for reproducibility (<https://sites.google.com/site/anshulkundaje/projects/idr>) and valid pairs with IDR p-value ≤ 0.01 were taken as the peak list. For ChIP-nexus, alignments were separated by strand, and peaks were called on strandwise BAM files using MACS2, parameters “-g mm --nomodel”, and no input. Peak summits were used for motif analysis using HOMER. ChIP data for H3K27ac, H3K4me1, EP300 and ATAC-seq were obtained from previously deposited data set SRA079975 from NCBI.

**Analysis of motif content**

Motif content HOXA1 bound regions were analyzed using the vertebrate motif set from TransFac v2016.2 (Matys et al., 2006) and searched with the FIMO program (Grant et al., 2011). Each peak set was given a background of 10 random coordinate sets, each with the same length and chromosomal distribution as the original peaks. Motif enrichment in peaks versus background was assessed with Fisher’s exact test, using BH p-value correction. To identify enriched known motifs in HOXA1 and TALE proteins bound region and HOXA1 bound region identified using ChIP-nexus, HOMER software package were used with parameter –size 100 (Heinz et al., 2010). Motif signature for TALE protein were generated using MEME suite. Enriched motifs were identified from genomic regions bound by individual TALE motifs using MEME (Bailey and Elkan, 1994). A list of motifs was generated through combining all novel and consensus TALE motifs identified from genome-wide binding analysis of individual TALE factors. Redundant motifs with more than 60% similarity were identified using MAST (Bailey and Gribskov, 1998). A final non-redundant motif list was generated by including the longest of these similar motifs and discarding the shorter variants. Non-redundant motifs were tested for their enrichment using AME (Buske et al., 2010) in individual TALE protein bound regions and a heatmap was generated through hierarchical clustering using p-values.

**Amplification of enhancers regions tested in transgenic zebrafish**

The sequences below were used for PCR amplifications of genomic regions for cloning into the HLC vector (Parker et al., 2014) for enhancer assays in zebrafish embryos. The coordinates (mm10) of the amplicons are also indicated.

| Near by gene | Coordinates (mm10) | Amplicon in bp | Forward primer | Reverse primer |
| --- | --- | --- | --- | --- |
| *Pbx1* | chr1:168,402,425-168,403,268 | 844 | 5’-ccatgaagagtgggcatg-3’ | 5’-aagtgatagccaagccaag-3’ |
| *Pbx3* | chr2:34,288,589-34,289,594 | 1006 | 5’-gctgctctctgatctttc-3’ | 5’-ctctggctttgtactgag-3’ |
| *Pbx3* | chr2:34,101,356-34,102,169 | 814 | 5’-tcagtcccggtgcctatt-3’ | 5’-ccacaatcctcctgcttc-3’ |
| *Pbx3* | chr2:34,112,169-34,113,479 | 1311 | 5’-cattcctaacagactcccac-3’ | 5’-gccatccctaccttgtgaag-3’ |
| *Meis1* | chr11:18873758-18875373 | 1616 | 5’actctgacagcccaataatgc3’ | 5’-acccacttttctggatttgag-3’ |
| *Meis1* | chr11:18982666-18983842 | 1177 | 5’-gcagtagtacagagactttcc-3’ | 5’-acatgtctccatagtcaagtg-3’ |
| *Meis2* | chr2:116,065,326-116,066,275 | 950 | 5’-gagcaatctttcagacccg-3’ | 5’-cagttaggcaggagccaag-3’ |
| *Meis2* | chr2:115858968-115860769 | 1802 | 5’gaagtaggggagaaaggtcc3’ | 5’-tttcgagctgtttaaatggcc-3’ |
| *Meis3* | chr7:16171955-16172,978 | 1024 | 5’-agagaagagagactgagatgg-3’ | 5’-gtgtttgggccactctac-3’ |
| *Meis3* | chr7:16183398-16184724 | 1327 | 5’-agcaatgctgtcctcaac-3’ | 5’-acttacctggtgtcctgac-3’ |
| *Tgif2* | chr2:156840779-156842093 | 1315 | 5’-gcgacgcggagaaagttt-3’ | 5’-agatctctgggctggctaag-3’ |
| *Meis2* | chr2:116067096-116068084 | 989 | 5’-atcctggccggagttcc-3’ | 5’-aaacccttggctggactctg-3’ |
| *Meis3* | chr2:115856008-115858033 | 2026 | 5’-tcagagctcggtgacacag-3’ | 5’-tgcccaaagaagtccaaag-3’ |

**Site directed Mutagenesis using Gibson assembly**

Site directed mutagenesis for various regions were carried out using Gibson assembly approach and cloned into the HLC vector (Parker et al., 2014) using the Gibson Assembly Master Mix (NEB). Following specific mutations were created.

| **Nearby Gene** | **Motifs** | **Original site** | **Changed to** |
| --- | --- | --- | --- |
| *Meis3* | HOX-PBX | 5’-TGATGGATGG-3’ | 5’-gctttgcgcc-3’ |
| *Meis3* | TGIF site 1 | 5’-AGGCAGATGGCAGGTCTGA-3’ | 5’-taccccgacctattttgtc-3’ |
| *Meis3* | TGIF site 2 | 5’-CAGACTGACAGTTGGAG-3’ | 5’-gcctccccgctacagaa-3’ |
| *Meis2* | HOX-PBX Site1 | 5’-TGATAAATGA-3’ | 5’-gctttgcgcc-3’ |
| *Meis2* | HOX-PBX Site 2 | 5’-TGATAAATGA-3’ | 5’-gctttgcgcc-3’ |
| *Meis2* | HOX | 5’-ATTAAATATTA-3’ | 5’-gctttgcgcc-3’ |

**Zebrafish transgenic lines:**

The following pre-existing zebrafish lines were used for experiments: Slusarski AB - wild type; *egr2b:KalTA4BI-1xUASkCherry* – mCherry inserted in the endogenous *egr2b* locus and expressed in r3 and r5 (Distel et al., 2009).

**Zebrafish reporter assay**

Zebrafish transgenesis was performed as previously described (Fisher et al., 2006). At least 100 embryos were injected for each construct. Supplemental Table S11 indicates the numbers of embryos injected and the efficiency of reporter expression for all constructs. Embryos were screened for GFP reporter expression at approximately 24 hpf and 48 hpf with a Leica M205FA microscope and images were captured for fluorescent and brightfield signals with a Leica DFC360FX camera using LAS AF imaging software. Images were cropped and altered for brightness and contrast using Adobe Photoshop CS6. For certain constructs, transgenic lines were generated by selecting 25 GFP-expressing F0 embryos for raising to adulthood and outcrossing with wild-type fish, with the resulting F1 progeny being screened for GFP fluorescence indicative of germline transgene integration. GFP expression domains were considered consistent for a given enhancer if shared between three independent F1 transgenics.

**Enriched KEGG pathway analysis**

For each peak set, all Ensembl 80 protein-coding nearest-neighbor genes were identified and analyzed for functional enrichments. Briefly, May 2016 KEGG pathway terms (<http://www.genome.jp/kegg/>) were downloaded and compared between gene lists versus the rest of the genome. Terms over-enriched in neighbor genes by Fisher Exact Test, BH-adjusted p-value ≤ 0.05, with at least 3 genes, were accepted.

**qPCR for quantification of *TALE* genes**

Each of the primer sets were optimized for linear amplification and primers were selected with slope of amplification between – 3 and -3.4 and r2 > 0.99. Dissociation curve analysis was done for all primers to ensure amplification of unique products. Stability of housekeeping genes in reaction were assessed using qBASE software and genes with M value less than 0.5 were selected. In current study *Ubc* and *B2M* were found to be most stable housekeeping controls.

| Gene | Forward primer | Reverse primer |
| --- | --- | --- |
| *Pbx1* | 5’-gatggtctcccagcaatcaa-3’ | 5’-cctagaagccttagccacatac-3’ |
| *Pbx2* | 5’-caggcagatctctgctgtattt-3’ | 5’-ctagtcttgcccaaaggttact-3’ |
| *Pbx3* | 5’-accctccgtcatgttatcaatc-3’ | 5’-ccagcctccattagcgttta-3’ |
| *Pbx4* | 5’-acagtgtccccaggtctctaa-3’ | 5’-gtggatgctttccctgtgta-3’ |
| *Meis1* | 5’-tggcacaagatacaggacttac -3’ | 5’- tctatcatgggctgcactattc-3’ |
| *Meis2* | 5’-cttgctcctatctcgggtttac-3’ | 5’-caccattcccagtttctttgc-3’ |
| *Meis3* | 5’-aacttctgtcaccgctacatc-3’ | 5’-caagatcctccctgcaactac-3’ |
| *Tgif1* | 5’-agaaggaggagaggcaatct-3’ | 5’-tctgagggataggcgttgta-3’ |
| *Tgif2* | 5’-ctgcccaaggagtcagtaaag-3’ | 5’-tggtctgtccagagagacttag-3’ |
| *Prep1* | 5’-tccttcagatgtgcgtgtatg-3’ | 5’-tggcagcactgttccttaat-3’ |
| *Prep2* | 5’-ggcctcctccttcattctattc-3’ | 5’-gtaagagcagtagcaccttctt-3’ |
| *Gapdh* | 5’-tggccaaggtcatccatga-3’ | 5’-cagtcttctgggtggcagtga-3’ |
| *Ubc* | 5’-gcccagtgttaccaccaagaag-3’ | 5’-gctctttttagatactgtggtgaggaa-3’ |
| *B2m* | 5’-cactgaccggcctgtatgc-3’ | 5’-ggtggcgtgagtatacttgaatttg-3’ |
| *Rpl13a* | 5’-cactctggaggagaaacggaagg-3’ | 5’-gcaggcatgaggcaaacagtc-3’ |
| *Hoxa1*  *Exon1* | 5’-ggacaatgcaagaatgaactcc-3’ | 5’-agttgtaatcccatggtcagag-3’ |
| *Hoxa1*  *Exon2* | 5’-cagaagaagcgtgagaaggag-3’ | 5’-gggctagatttctcagatgattctt-3’ |

**Immuno-precipitation of HOXA1 bound proteins and MudPIT**

Cell Culture

18 x T225 flasks were prepared of control wt-KH2 cells and the KH2 line bearing HOXA1 with a C-terminal 3xFlag-Myc epitope tag. For the 24hr prior to harvest, cells were treated with 1 µg/ml Doxycycline (Calbiochem #324385) and 3.3 µM 9-Cis retinoic acid (VWR #89158-738). At harvest, the media was removed and replaced with 10ml/T225 TrypLE (Life Technologies #12604021) for 5 min at 37°C. TrypLE was quenched with an equal volume of FCS (VWR/Hyclone #82007-422), triturated, partially pooled and centrifuged at 800 rpm for 10 min. Cell pellets were re-suspended in PBS (Gibco #14190144), pooled and centrifuged at 800 rpm for 10 min. Cell pellets were then washed with 40 ml of PBS (Gibco #14190144) and centrifuged at 800 rpm for 10 min. The resulting cell pellet was subjected to the chromatin isolation procedure.

Chromatin Isolation:

Cell pellets were re-suspended in 7ml of Dignam buffer A (10 mM Hepes, pH 7.9 (US Biological Life Sciences #H2010 / US Biological Life Sciences #H2030), 1.5mM MgCl2 (Avantor/JTBaker #2444-01), 10mM KCl (EMD Millipore Corp/Calbiochem #7300), 0.5mM DTT (VWR #97061-340), 1/100 protease inhibitors (Sigma Aldrich #P8340)). Cells were then broken by dounce homogenization 25 times with the loose pestle. Breakage was verified by trypan blue exclusion (Sigma Aldrich #T8154) and loose dounce homogenization was repeated, if necessary. Cytoplasmic and nuclear fractions were separated by centrifugation at 12kxg for 45 min. After removal of the cytoplasmic fraction, the nuclear pellet was re-suspended in 4ml of nuclear lysis buffer (20 mM HEPES (pH 7.9) (US Biological Life Sciences #H2010 / US Biological Life Sciences #H2030), 3 mM EDTA (EMD Millipore Corp/Calbiochem #4050), 10% glycerol (Amresco #0854), 150 mM potassium acetate (VWR #0698), 1.5 mM MgCl2 (Avantor/JTBaker #2444-01), 1 mM DTT (VWR #97061-340), 0.1% Nonidet P-40 (Axell A56009), and 1/100 protease inhibitors (Sigma Aldrich #P8340)). The nuclear fraction was then homogenized by douncing with the tight pestle 30x. The resultant extract was then centrifuged at 15k xg for 30min to separate the nucleoplasmic fraction and the chromatin pellet. The chromatin pellet was then re-suspended in 1ml of nuclease incubation buffer (150mM Hepes (pH 7.9) (US Biological Life Sciences #H2010 / US Biological Life Sciences #H2030), 1.5 mM MgCl2 (Avantor/JTBaker #2444-01), 150 mM KOAc (VWR #0698), 10% glycerol (Amresco #0854), and 1/100 protease inhibitors (Sigma Aldrich #P8340). 0.15U/µl Benzonase (Sigma Aldrich E8263) was added and the chromatin fractions were digested overnight at 4°C while rocking. The following day digested chromatin fractions were centrifuged at 20K rpm in a 70.1 Ti rotor in an ultracentrifuge for 1hr. The resulting supernatant was collected as the chromatin fraction.

Immuno-precipitation

The protein content of chromatin fraction samples was measured by Qubit assay (Life Technologies #Q33211) and normalized to less than 2 µg/µl protein concentration. Flag agarose beads (Sigma Aldrich #A2220) were equilibrated in nuclease incubation buffer and chromatin fractions were then added to the equilibrated beads. IP was carried out at 4°C overnight while rocking. The following day, beads were washed 2x 5 min and 6 x 15 min rocking at 4°C in wash buffer (20mMHEPES (pH 7.9) (US Biological Life Sciences #H2010 / US Biological Life Sciences #H2030), 150 mM KCl (EMD Millipore Corp/Calbiochem #7300), 0.5 mM EDTA (EMD Millipore Corp/Calbiochem #4050), 0.1% Triton X-100 (Alfa Aesar #A16046), 10% glycerol (Amresco #0854), and 1/1000 protease inhibitors (Sigma Aldrich #P8340)) each followed by centrifugation at 500 rpm in a benchtop centrifuge in a cold room. Captured proteins were then eluted in 2 x 300 µl 0.1M Glycine pH 3 (Sigma Aldrich #G7126 / J.T.Baker #9535-05). Eluates were then neutralized by the addition of 100µl of 1M Tris pH 8 (Amresco #0497/ EMD Chemicals-Calbiochem#9310). Neutralized eluates were centrifuged briefly to remove remaining agarose beads and stored at -80°C until processed for proteomic analysis.

MudPit Sample Preparation

Samples were thawed on ice. 0.1U of Benzonase (Sigma Aldrich #E8263) was added and samples were incubated at 37°C for 30min. Samples were then chilled on ice and TCA (Trichloroaceitic acid (Sigma Aldrich #T0699)) was added to a final proportion of 20% of the final volume. Protein precipitation was then carried out overnight at 4°C. Samples were then centrifuged at 14k rpm for 30 min at 4°C. Supernatants were aspirated with gel loading tips. Pellets were then washed twice with 500 µl cold acetone (Mallinckrodt #2440-16), each followed by centrifugation at 14k rpm for 10 min at 4°C. After the final wash, the acetone was removed and the pellet was air dried. Dried pellets were then subjected to MudPit proteomics analysis.

MudPIT analysis

TCA-precipitated proteins were urea-denatured, reduced, alkylated, and digested with endoproteinase Lys-C (Roche) followed by modified trypsin (Promega) as described in (Washburn et al., 2001). Peptide mixtures were loaded onto split triple phase fused silica microcapillary columns packed with 5-μm C18 reverse phase (Aqua, Phenomenex), strong cation exchange particles (Luna SCX, Phenomenex), and reverse phase (Florens and Washburn, 2006). Loaded microcapillary columns were placed in-line with a Quaternary Agilent 1100 series HPLC pump and an LTQ linear ion trap mass spectrometer equipped with a nano-LC electrospray ionization source (Thermo Fisher, San Jose, CA). Fully automated 10-step MudPIT runs were carried out on the electrosprayed peptides, as described in (Florens and Washburn, 2006). Tandem mass (MS/MS) spectra were interpreted using SEQUEST (Eng et al., 1994) against a database of 115,764 non-redundant sequences, consisting of 57,703 mouse proteins (NCBI, 2015-03-04 release), 179 usual contaminants (such as human keratins, IgGs, and proteolytic enzymes), and, to estimate false discovery rates (FDRs), 57,882 randomized amino acid sequences derived from each non-redundant protein entry. MS/MS spectra matched to fully-tryptic peptides of at least 7 amino acids long were sorted and selected using a combination of DTASelect (Tabb et al., 2002) and an in-house software, swallow, to allow at most 5% FDRs at the peptide and protein levels. Peptide hits from multiple runs were compared using CONTRAST (Tabb et al., 2002). Combining all runs, proteins had to be detected by at least 2 peptides, or 1 peptide with 2 independent spectra. Proteins that were subsets of others were removed. The calculated FDRs were less than 0.5% at the spectral, peptide, and protein levels. To estimate relative protein levels, distributed Normalized Spectral Abundance Factors (dNSAFs) were calculated for each detected protein/protein group, as described in (Zhang et al., 2010). The QSPEC/QPROT software (version 1.2.2) was also used for the statistical analysis of protein enrichment in the four replicate HOXA1 samples compared to control (Choi et al., 2008)

**Generation of heterozygous *Hoxa1 (Hoxa1+/-)* ES lines using CRISPR**

Since transient selection with puromycin is not possible with the KH2 cell line a GFP carrying vector, pX330-U6-Chimeric_BB-CBh-hSpCas9 (Cong et al., 2013), was modified for cloning of two guide RNAs each against *Hoxa1* exon1 and exon2 respectively. One was placed under regulation of U6 and the other under the Human H1 promoter and cells were transfected both plasmids using X-tremeGENE 9 DNA Transfection Reagent (Sigma Aldrich). **
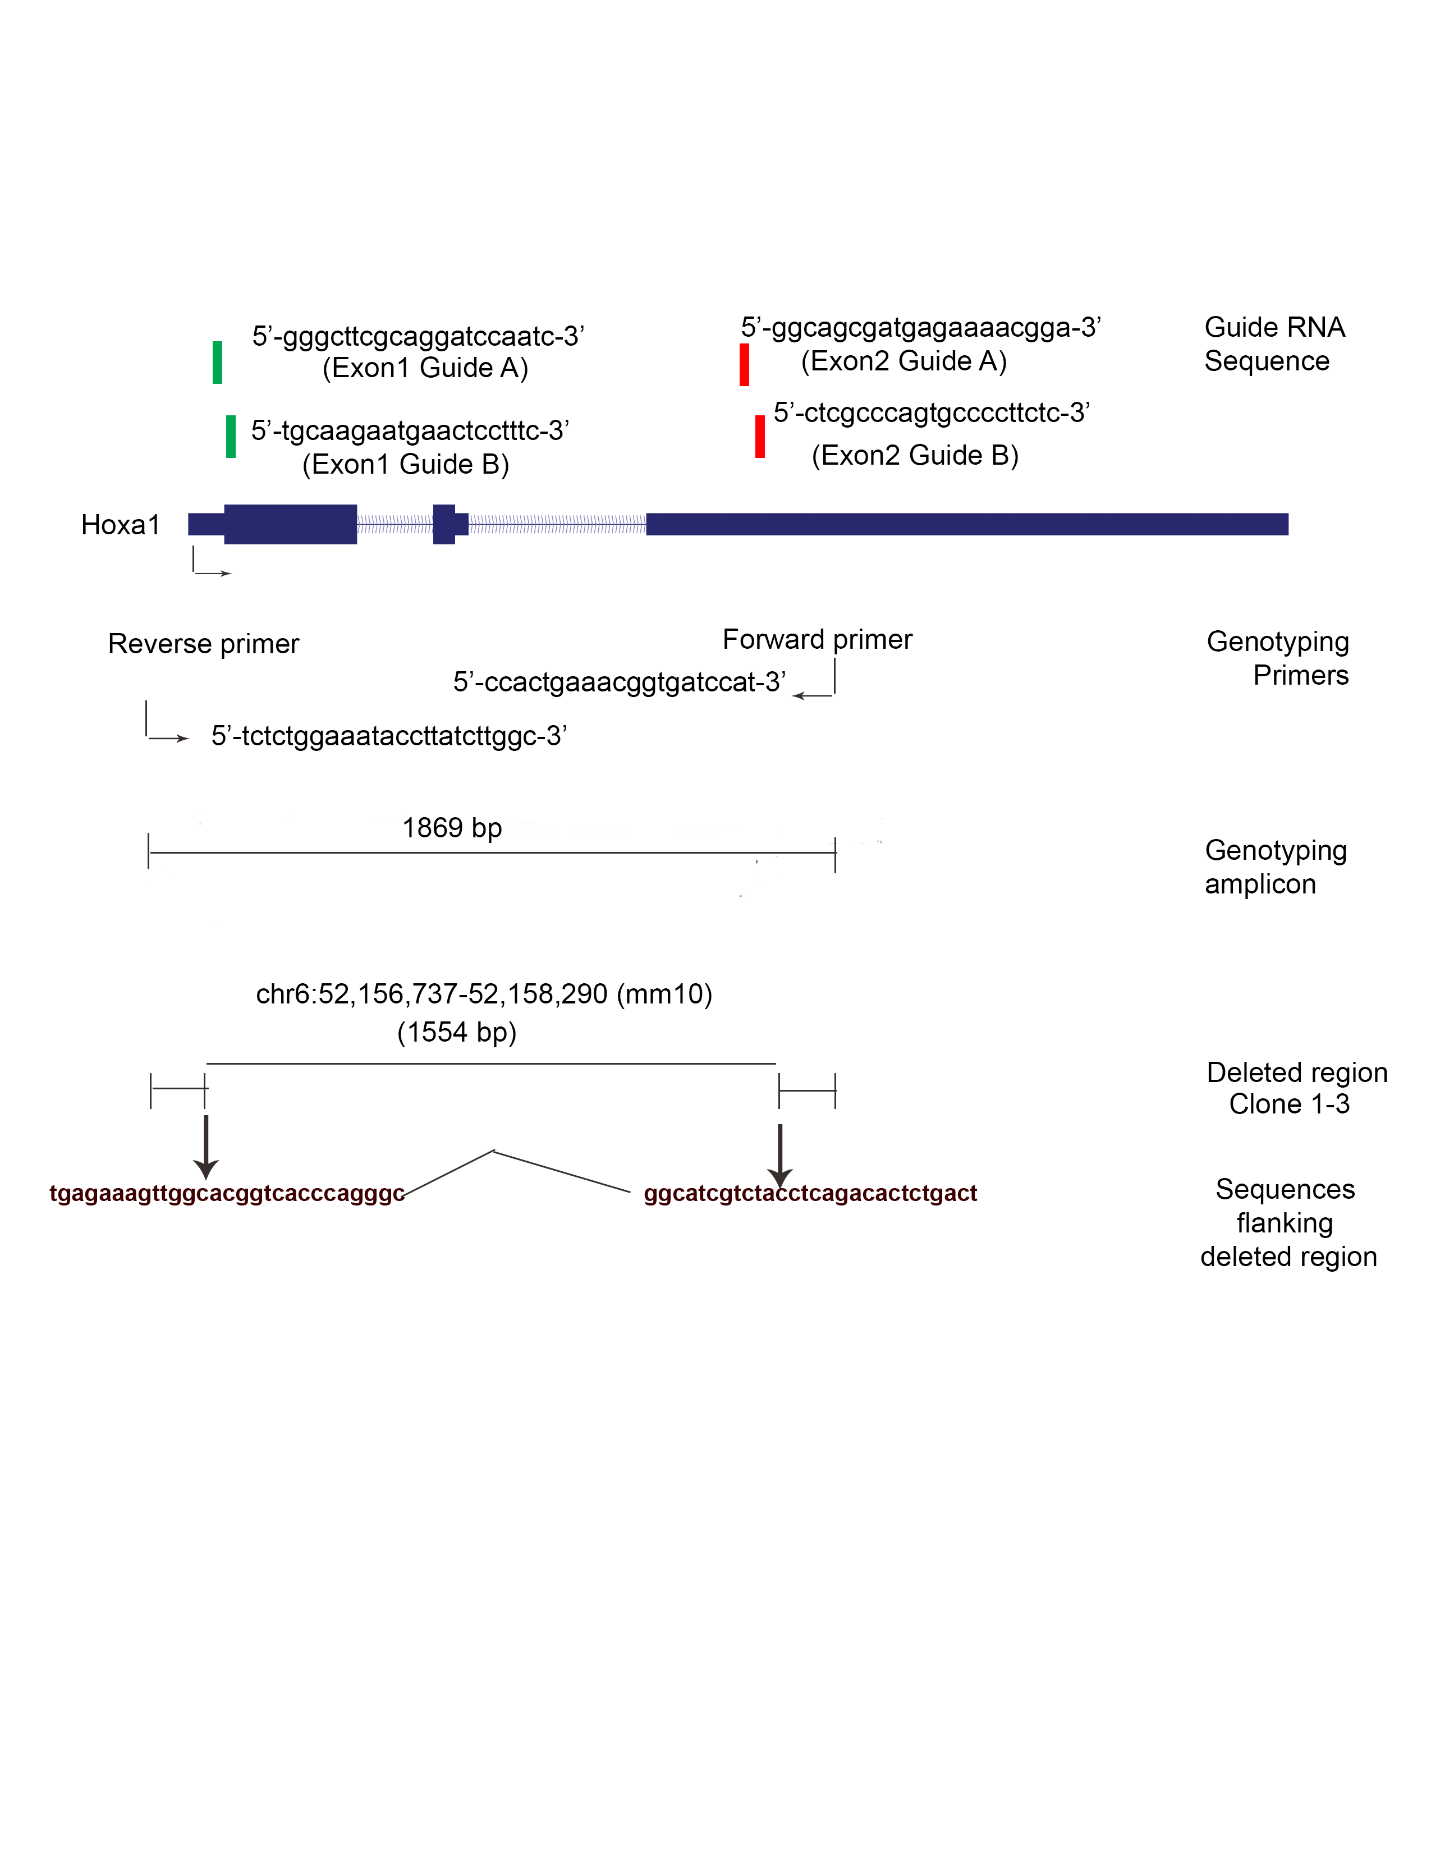
** After 48 hours of transfection, GFP positive cells were sorted using moFLow legacy under sterile conditions and GFP positive cells were cultured for 7 days. Individual clones were picked, expanded and genotyped for deletion in *Hoxa1* gene. We found no examples of homozygous deletions of *Hoxa1* but identified three independent lines where one copy of *Hoxa1* was deleted. All three clones have the same 1554 bp deletion spanning genomics coordinate chr6:52,156,737-52,158,290 (mm10) between exon 1 and exon2 of *Hoxa1* gene. Triplicate samples of all three lines were used for qPCR experiments to monitor changes in the level of *TALE* gene expression.

Bailey, T.L., Elkan, C., 1994. Fitting a mixture model by expectation maximization to discover motifs in biopolymers. Proc. Int. Conf. Intell. Syst. Mol. Biol. 2, 28-36.

Bailey, T.L., Gribskov, M., 1998. Combining evidence using p-values: application to sequence homology searches. Bioinformatics 14, 48-54.

Beard, C., Hochedlinger, K., Plath, K., Wutz, A., Jaenisch, R., 2006. Efficient method to generate single-copy transgenic mice by site-specific integration in embryonic stem cells. Genesis 44, 23-28.

Buske, F.A., Boden, M., Bauer, D.C., Bailey, T.L., 2010. Assigning roles to DNA regulatory motifs using comparative genomics. Bioinformatics 26, 860-866.

Choi, H., Fermin, D., Nesvizhskii, A.I., 2008. Significance analysis of spectral count data in label-free shotgun proteomics. Mol Cell Proteomics 7, 2373-2385.

Cong, L., Ran, F.A., Cox, D., Lin, S., Barretto, R., Habib, N., Hsu, P.D., Wu, X., Jiang, W., Marraffini, L.A., Zhang, F., 2013. Multiplex genome engineering using CRISPR/Cas systems. Science 339, 819-823.

De Kumar, B., Parrish, M.E., Slaughter, B.D., Unruh, J.R., Gogol, M., Seidel, C., Paulson, A., Li, H., Gaudenz, K., Peak, A., McDowell, W., Fleharty, B., Ahn, Y., Lin, C., Smith, E., Shilatifard, A., Krumlauf, R., 2015. Analysis of dynamic changes in retinoid-induced transcription and epigenetic profiles of murine Hox clusters in ES cells. Genome Res 25, 1229-1243.

Distel, M., Wullimann, M.F., Koster, R.W., 2009. Optimized Gal4 genetics for permanent gene expression mapping in zebrafish. Proc Natl Acad Sci U S A 106, 13365-13370.

Eng, J.K., McCormack, A.L., Yates, J.R., 1994. An approach to correlate tandem mass spectral data of peptides with amino acid sequences in a protein database. J. Am. Soc. Mass Spectrom. 5, 976-989.

Fisher, S., Grice, E.A., Vinton, R.M., Bessling, S.L., Urasaki, A., Kawakami, K., McCallion, A.S., 2006. Evaluating the biological relevance of putative enhancers using Tol2 transposon-mediated transgenesis in zebrafish. Nature protocols 1, 1297-1305.

Florens, L., Washburn, M.P., 2006. Proteomic analysis by multidimensional protein identification technology. Methods Mol Biol 328, 159-175.

Grant, C.E., Bailey, T.L., Noble, W.S., 2011. FIMO: scanning for occurrences of a given motif. Bioinformatics 27, 1017-1018.

He, Q., Johnston, J., Zeitlinger, J., 2015. ChIP-nexus enables improved detection of in vivo transcription factor binding footprints. Nat Biotechnol 33, 395-401.

Heinz, S., Benner, C., Spann, N., Bertolino, E., Lin, Y.C., Laslo, P., Cheng, J.X., Murre, C., Singh, H., Glass, C.K., 2010. Simple combinations of lineage-determining transcription factors prime cis-regulatory elements required for macrophage and B cell identities. Mol Cell 38, 576-589.

Langmead, B., Salzberg, S.L., 2012. Fast gapped-read alignment with Bowtie 2. Nat. Methods 9, 357-359.

Matys, V., Kel-Margoulis, O.V., Fricke, E., Liebich, I., Land, S., Barre-Dirrie, A., Reuter, I., Chekmenev, D., Krull, M., Hornischer, K., Voss, N., Stegmaier, P., Lewicki-Potapov, B., Saxel, H., Kel, A.E., Wingender, E., 2006. TRANSFAC and its module TRANSCompel: transcriptional gene regulation in eukaryotes. Nucleic Acids Res 34, D108-110.

Parker, H.J., Bronner, M.E., Krumlauf, R., 2014. A Hox regulatory network of hindbrain segmentation is conserved to the base of vertebrates. Nature 514, 490-493.

Smith, K.T., Martin-Brown, S.A., Florens, L., Washburn, M.P., Workman, J.L., 2010. Deacetylase inhibitors dissociate the histone-targeting ING2 subunit from the Sin3 complex. Chem. Biol. 17, 65-74.

Tabb, D.L., McDonald, W.H., Yates, J.R., 3rd, 2002. DTASelect and Contrast: tools for assembling and comparing protein identifications from shotgun proteomics. J Proteome Res 1, 21-26.

Washburn, M.P., Wolters, D., Yates, J.R., 3rd, 2001. Large-scale analysis of the yeast proteome by multidimensional protein identification technology. Nat Biotechnol 19, 242-247.

Zhang, Y., Liu, T., Meyer, C.A., Eeckhoute, J., Johnson, D.S., Bernstein, B.E., Nusbaum, C., Myers, R.M., Brown, M., Li, W., Liu, X.S., 2008. Model-based analysis of ChIP-Seq (MACS). Genome Biol. 9, R137.

Zhang, Y., Wen, Z., Washburn, M.P., Florens, L., 2010. Refinements to label free proteome quantitation: how to deal with peptides shared by multiple proteins. Anal Chem 82, 2272-2281.
