# Supplementary material for: HOXA1 and TALE proteins display cross-regulatory interactions and form a combinatorial binding code on HOXA1 targets
Source: HighWire-hosted journal article supplement (doi:10.1101/gr.219386.116), 2017-08-07
Supplement: Supplemental_Table_S3.docx [file Supplemental_Table_S3.docx]

**Supplemental Table S3**. Enriched motifs from HOXA1 bound regions identified from ChIP-seq in ES cells.

| SN | Motif logo | P-value | Known motifs |
| --- | --- | --- | --- |
| 1 | 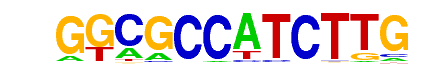 | 1.00E-253 | YY1(ZF) |
| 2 | 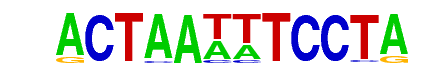 | 1.00E-235 | FEV |
| 3 | 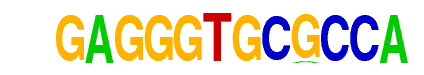 | 1.00E-229 | ZFP128 |
| 4 | 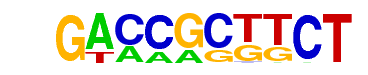 | 1.00E-229 | DCE |
| 5 | 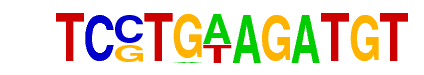 | 1.00E-228 | DPE |
| 6 | 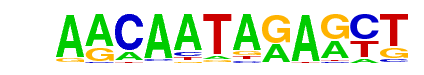 | 1.00E-210 | SOX7 |
| 7 | 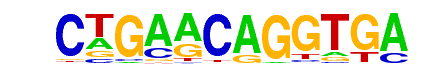 | 1.00E-209 | E2A(BHLH |
| 8 | 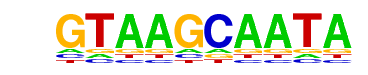 | 1.00E-191 | FOXD1 |
| 9 | 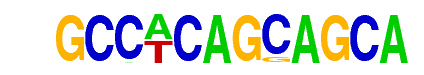 | 1.00E-156 | Unknown-ESC-element (?) |
| 10 | 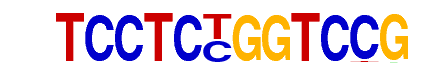 | 1.00E-147 | TCFAP2A_2 |
| 11 | 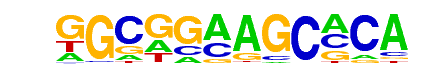 | 1.00E-144 | NRF1(NRF) |
| 12 | 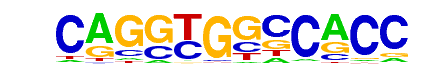 | 1.00E-141 | E2A(BHLH |
| 13 | 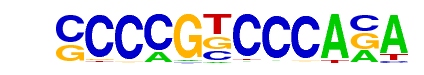 | 1.00E-139 | BCL6B_2 |
| 14 | 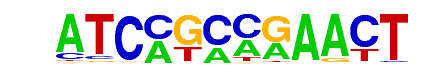 | 1.00E-138 | STAT6 |
| 15 | 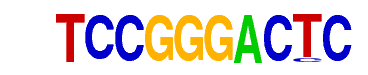 | 1.00E-131 | STAT3 |
| 16 | 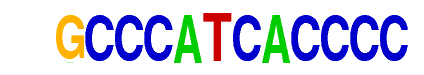 | 1.00E-120 | SREBF2 |
| 17 | 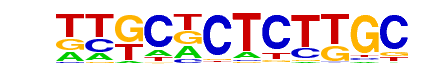 | 1.00E-117 | BHLHE40 |
| 18 | 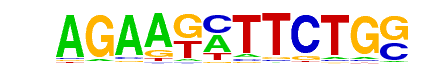 | 1.00E-114 | HRE |
| 19 | 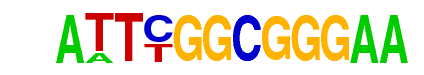 | 1.00E-114 | E2F1 |
| 20 | 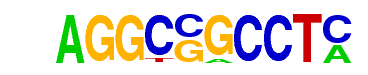 | 1.00E-113 | BREU |
| 21 | 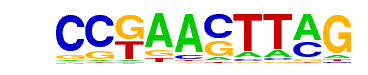 | 1.00E-109 | ETS |
| 22 | 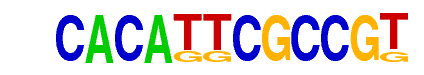 | 1.00E-99 | NRF1 |
| 23 | 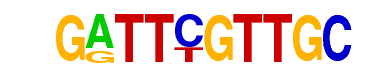 | 1.00E-95 | RFXDC2 |
| 24 | 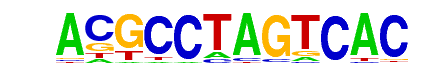 | 1.00E-95 | ZNF711 |
| 25 | 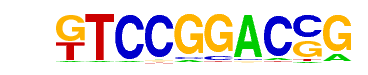 | 1.00E-83 | ELK1 |
| 26 | 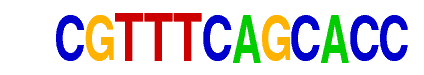 | 1.00E-80 | TBX20 |
| 27 | 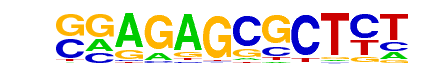 | 1.00E-76 | ZFP691 |
| 28 | 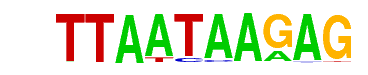 | 1.00E-55 | ALX1 |
| 29 | 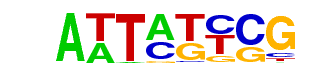 | 1.00E-47 | PDX1 |
| 30 | 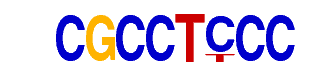 | 1.00E-38 | MAZ |
| 31 | 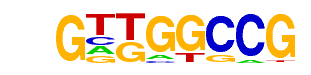 | 1.00E-33 | KLF7 |
