# Supplementary material for: HOXA1 and TALE proteins display cross-regulatory interactions and form a combinatorial binding code on HOXA1 targets
Source: HighWire-hosted journal article supplement (doi:10.1101/gr.219386.116), 2017-08-07
Supplement: Supplemental_Table_S4.docx [file Supplemental_Table_S4.docx]

**Supplemental Table S4**. Enriched motifs from HOXA1 bound regions identified from ChIP-seq in differentiated cells.

| **Motifs** | **P-value** | **Known motifs** |
| --- | --- | --- |
| 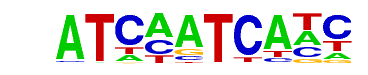 | 1e-485 | HOXA2 |
| 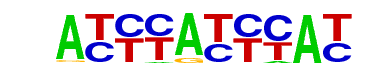 | 1.00E-161 | HBP1_1 |
| 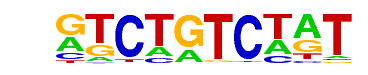 | 1.00E-98 | PKNOX2 |
| 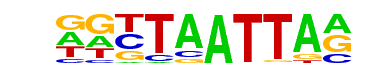 | 1.00E-71 | LHX3 |
| 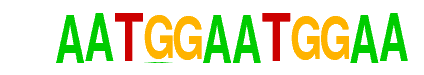 | 1.00E-71 | ZFP410 |
| 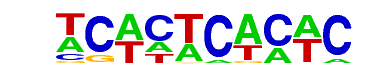 | 1.00E-44 | EGR2 |
| 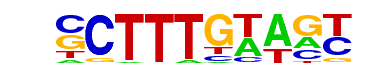 | 1.00E-37 | TCF3(HMG) |
| 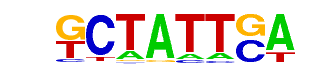 | 1.00E-31 | SOX1 |
| 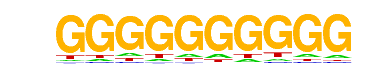 | 1.00E-29 | ZFP281 |
| 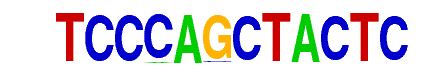 | 1.00E-25 | TCF3 |
| 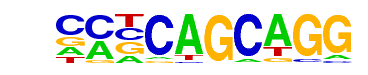 | 1.00E-25 | Unknown-ESC-element(?) |
| 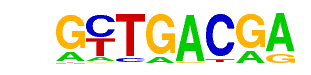 | 1.00E-21 | MAFB |
| 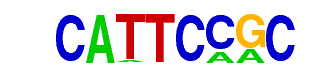 | 1.00E-18 | TEAD1 |
| 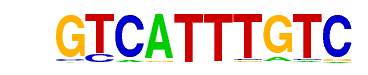 | 1.00E-17 | HOXB4 |
| 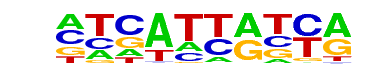 | 1.00E-14 | SOX17 |
| 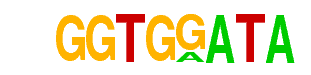 | 1.00E-14 | ZNF354C |
| 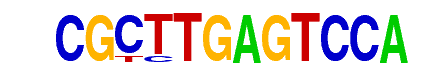 | 1.00E-14 | HNF4A |
| 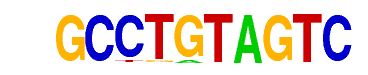 | 1.00E-13 | TCFAP2A |
| 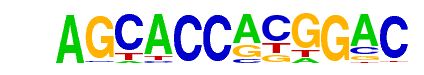 | 1.00E-12 | REST |
