# Supplementary material for: HOXA1 and TALE proteins display cross-regulatory interactions and form a combinatorial binding code on HOXA1 targets
Source: HighWire-hosted journal article supplement (doi:10.1101/gr.219386.116), 2017-08-07
Supplement: Supplemental_Table_S6.docx [file Supplemental_Table_S6.docx]

**Supplemental Table S6**. Enriched motifs from TALE protein bound regions identified from ChIP-seq in differentiated cells.

| **SN** | **Motif logo** | **P-value** | **Known TF binding** |
| --- | --- | --- | --- |
|  | **MEIS** | | |
| **1** | 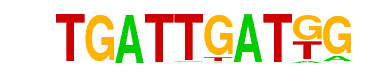 | 1.00E-85 | **PDX1, HOX-PBX bipartite** |
| **2** | 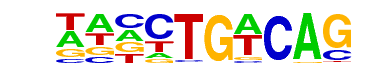 | 1.00E-22 | **MEIS1** |
| **3** | 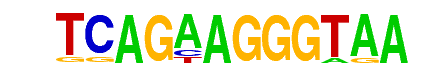 | 1.00E-14 | Unknown-ESC-element(?) |
| **4** | 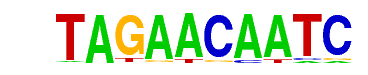 | 1.00E-13 | SOX12 |
|  | **PBX** | | |
| **1** | 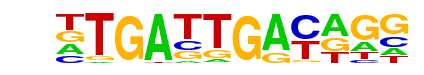 | 1.00E-215 | **PBX3** |
| **2** | 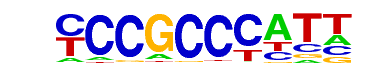 | 1.00E-33 | GC-BOX |
| **3** | 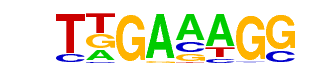 | 1.00E-30 | PKNOX2 |
| **4** | 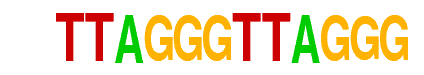 | 1.00E-29 | CRX |
| **5** | 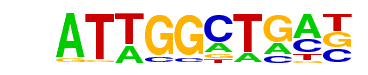 | 1.00E-28 | NFY(CCAAT) |
| **6** | 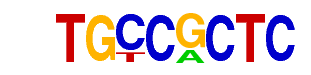 | 1.00E-27 | **PBX3** |
| **7** | 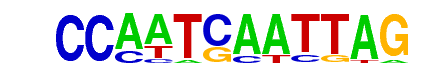 | 1.00E-21 | PAX7 |
| **8** | 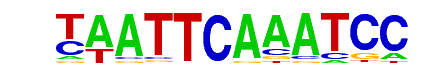 | 1.00E-19 | SOX1 |
| **9** | 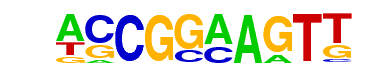 | 1.00E-18 | ETS(ETS) |
| **10** | 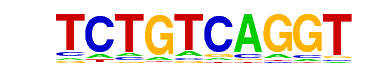 | 1.00E-16 | **MEIS1** |
| **11** | 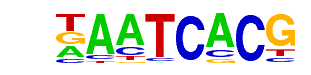 | 1.00E-15 | GFI1, |
| **12** | 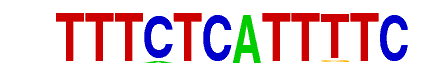 | 1.00E-15 | MTF1_2 |
| **13** | 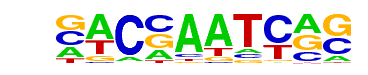 | 1.00E-15 | NFYB |
| **14** | 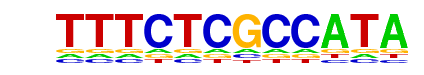 | 1.00E-14 | E2F7(E2F) |
| **15** | 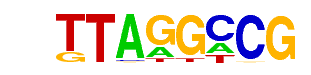 | 1.00E-13 | ZNF711(ZF) |
|  | **TGIF** | | |
| **1** | 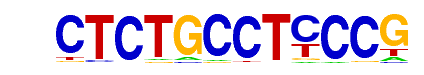 | 1.00E-173 | HIC1 |
| **2** | 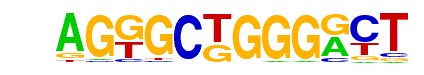 | 1.00E-153 | KLF5 |
| **3** | 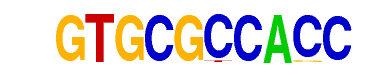 | 1.00E-145 | ZFP128 |
| **4** | 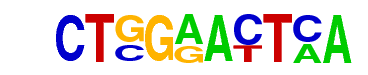 | 1.00E-139 | **PBX1** |
| **5** | 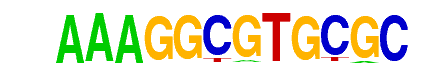 | 1.00E-131 | SP4 |
| **6** | 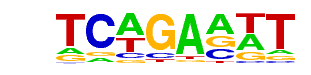 | 1.00E-125 | EHF_2 |
| **7** | 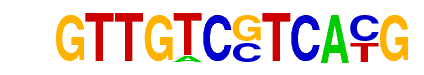 | 1.00E-107 | ATF7(BZIP) |
| **8** | 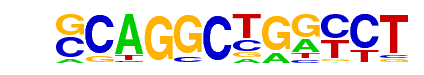 | 1.00E-105 | SMAD2(MAD) |
| **9** | 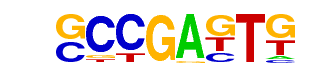 | 1.00E-102 | NFY(CCAAT) |
| **10** | 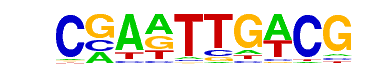 | 1.00E-101 | IRC900814 |
| **11** | 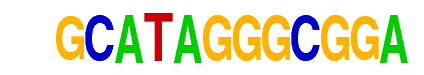 | 1.00E-100 | GCM1 |
| **12** | 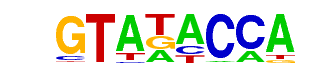 | 1.00E-100 | FOXD1 |
| **13** | 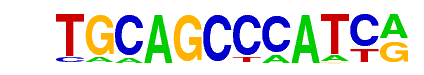 | 1.00E-99 | ZFP410 |
| **14** | 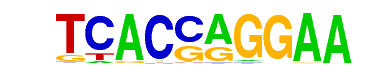 | 1.00E-99 | EHF(ETS) |
| **15** | 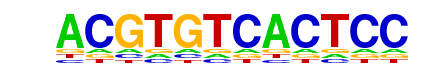 | 1.00E-87 | **PBX3** |
| **16** | 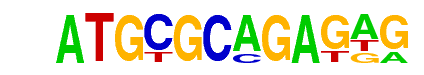 | 1.00E-81 | NRF1(NRF) |
| **17** | 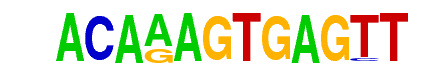 | 1.00E-80 | SOX10 |
| **18** | 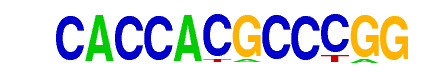 | 1.00E-79 | KLF7_1 |
| **19** | 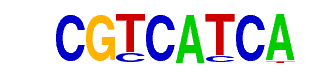 | 1.00E-75 | NFE2L1 |
| **20** | 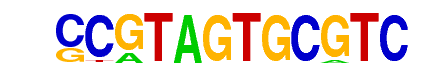 | 1.00E-70 | GMEB1 |
| **21** | 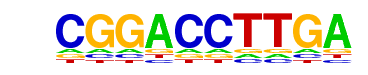 | 1.00E-66 | NR5A2(NR) |
| **22** | 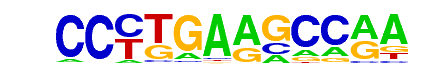 | 1.00E-60 | TFAP2C |
| **23** | 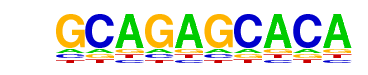 | 1.00E-59 | RXRA |
| **24** | 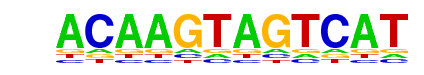 | 1.00E-45 | NFE2L1 |
| **25** | 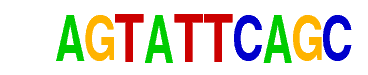 | 1.00E-39 | MAFB |
| **26** | 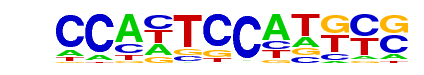 | 1.00E-37 | TEAD |
| **27** | 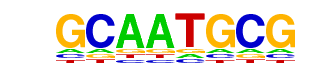 | 1.00E-34 | ZFP161 |
| **28** | 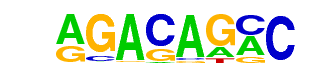 | 1.00E-32 | MYF6_2 |
| **29** | 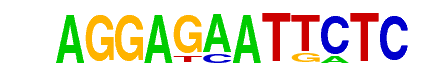 | 1.00E-30 | IRF5_2 |
| **30** | 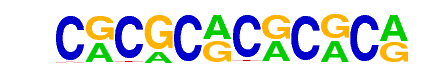 | 1.00E-28 | NRF1 |
| **31** | 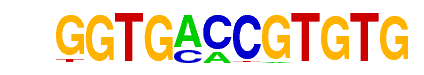 | 1.00E-22 | ESRRA |
| **32** | 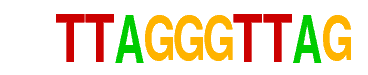 | 1.00E-19 | CRX |
| **33** | 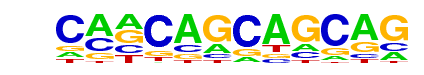 | 1.00E-14 | ASCL2 |
| **PREP1** | | | |
| **1** | 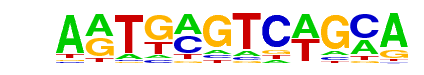 | 1e-547 | MAFA |
| **2** | 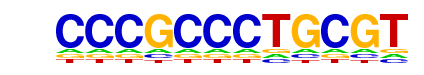 | 1e-385 | KLF5 |
| **3** | 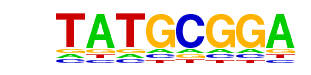 | 1e-362 | GCM1 |
| **4** | 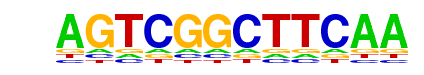 | 1e-357 | CHR |
| **5** | 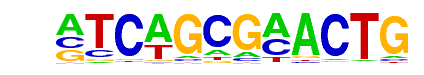 | 1e-353 | ZFP691 |
| **6** | 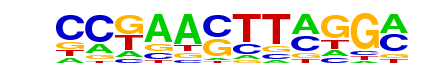 | 1e-352 | EHF |
| **7** | 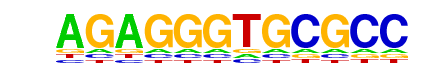 | 1e-317 | E2F3 |
| **8** | 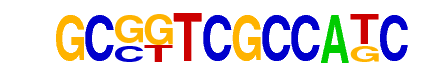 | 1.00E-299 | YY1(ZF) |
| **9** | 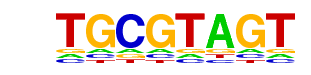 | 1.00E-298 | ARNT::AHR |
| **10** | 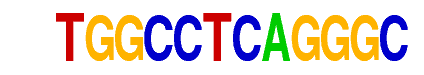 | 1.00E-295 | TFAP2A |
| **11** | 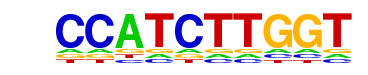 | 1.00E-232 | YY1 |
| **12** | 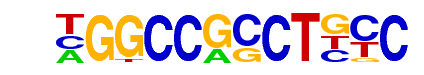 | 1.00E-228 | TLX?(NR) |
| **13** | 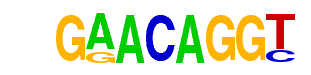 | 1.00E-202 | AR-HALFSITE(NR) |
| **14** | 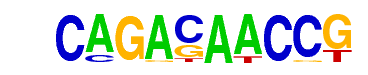 | 1.00E-199 | SMAD4(MAD) |
| **15** | 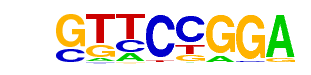 | 1.00E-196 | ELK1 |
| **16** | 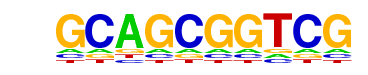 | 1.00E-193 | TCF12 |
| **17** | 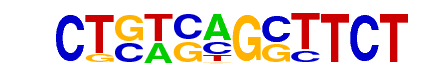 | 1.00E-186 | DCE |
| **18** | 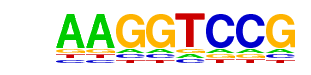 | 1.00E-182 | HINFP |
| **19** | 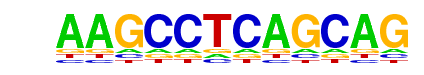 | 1.00E-154 | NRF2(BZIP) |
| **20** | 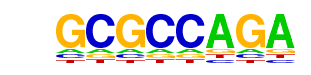 | 1.00E-152 | E2F2_2 |
| **21** | 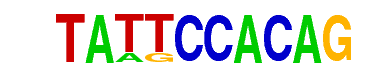 | 1.00E-148 | FOXH1 |
| **22** | 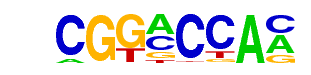 | 1.00E-142 | GLI3(ZF) |
| **23** | 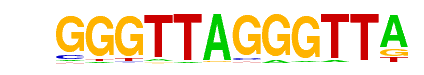 | 1.00E-121 | CRX |
| **24** | 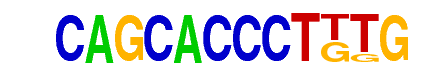 | 1.00E-112 | KLF1 |
| **25** | 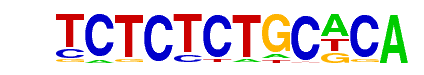 | 1.00E-109 | ZSCAN4 |
| **26** | 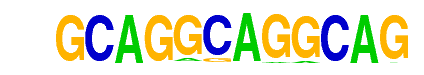 | 1.00E-85 | PAX8 |
| **27** | 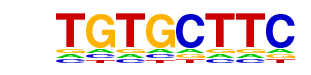 | 1.00E-85 | ZSCAN4 |
| **28** | 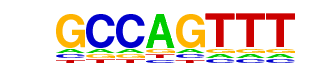 | 1.00E-71 | MYB |
| **29** | 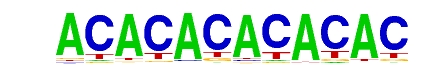 | 1.00E-64 | GM397 |
| **30** | 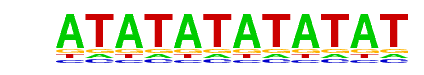 | 1.00E-21 | TBP |
| **PREP2** | | | |
| **1** | 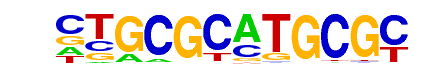 | 1.00E-117 | NRF1(NRF) |
| **2** | 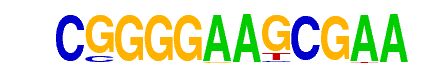 | 1.00E-20 | PU.1-IRF(ETS:IRF) |
| **3** | 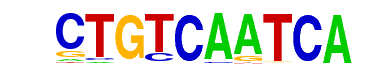 | 1.00E-18 | **PBX3** |
| **4** | 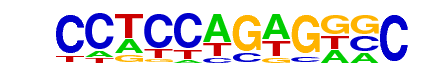 | 1.00E-16 | BORIS(ZF) |
| **5** | 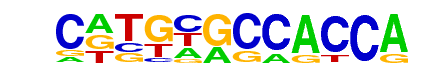 | 1.00E-16 | E2F2 |
| **6** | 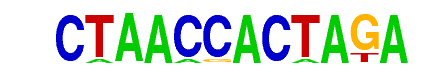 | 1.00E-15 | NKX2 |
| **7** | 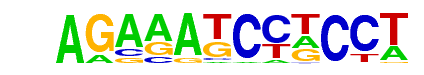 | 1.00E-15 | GATA5 |
| **8** | 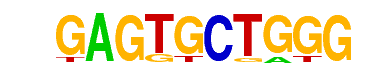 | 1.00E-13 | NKX3.1 |
| **9** | 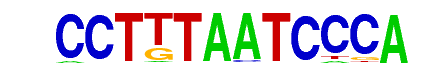 | 1.00E-12 | GSC |
