# Supplementary material for: HOXA1 and TALE proteins display cross-regulatory interactions and form a combinatorial binding code on HOXA1 targets
Source: HighWire-hosted journal article supplement (doi:10.1101/gr.219386.116), 2017-08-07
Supplement: Supplemental_Table_S7.docx [file Supplemental_Table_S7.docx]

**Supplemental Table S7**. Enriched motifs from HOXA1 bound regions identified from ChIP-nexus in differentiated cells.

| Motifs | P-value | % of targets | Known binding sites |
| --- | --- | --- | --- |
| 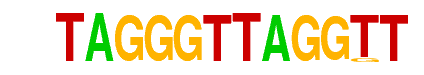 | 1e-2369 | 20.92% | CRX(Homeobox) |
| 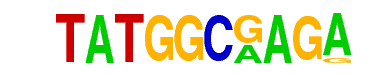 | 1e-1079 | 10.51% | GFX(?) |
| 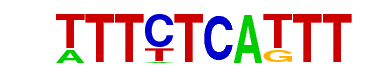 | 1e-1007 | 21.57% | MTF1_2 |
| 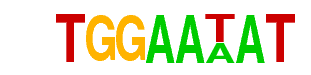 | 1e-849 | 16.31% | NFATC2 |
| 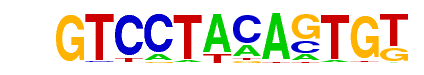 | 1e-747 | 7.62% | HOXC10 |
| 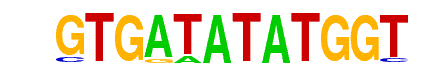 | 1e-664 | 6.88% | HOXA9/ HOX-PBX_bipartite |
| 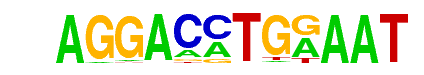 | 1e-606 | 6.36% | PU.1-IRF(ETS:IRF) |
| 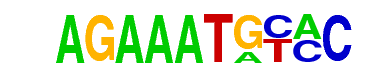 | 1e-502 | 8.14% | IRF3_2 |
| 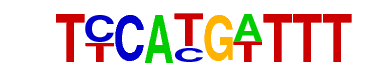 | 1e-445 | 9.43% | HDX |
| 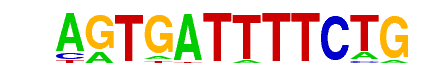 | 1e-417 | 5.07% | GFI1 |
| 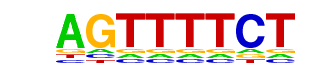 | 1e-324 | 8.54% | HOXD13 |
| 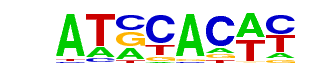 | 1e-270 | 9.46% | FOXH1 |
