# Supplementary material for: HOXA1 and TALE proteins display cross-regulatory interactions and form a combinatorial binding code on HOXA1 targets
Source: HighWire-hosted journal article supplement (doi:10.1101/gr.219386.116), 2017-08-07
Supplement: Supplemental_Table_S9.docx [file Supplemental_Table_S9.docx]

| **Motif ID** | **Motif** | **MEIS** | **PBX** | **PREP1** | **PREP2** | **TGIF** |
| --- | --- | --- | --- | --- | --- | --- |
| **M1** | 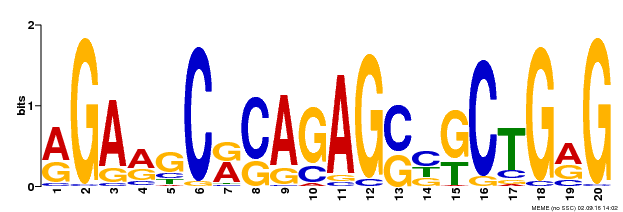 | 5.81 | 170.70 | 128.12 | 7.64 | 28.12 |
| **M2** | 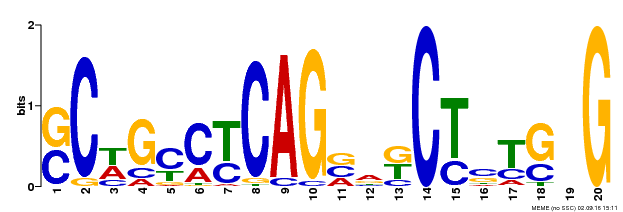 | 9.00 | 116.82 | 78.80 | 2.77 | 10.03 |
| **M3** | 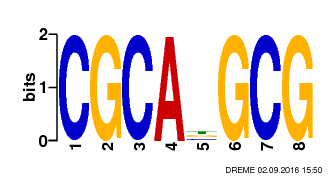 | 5.67 | 139.97 | 38.90 | 64.61 | 14.65 |
| **M4** | 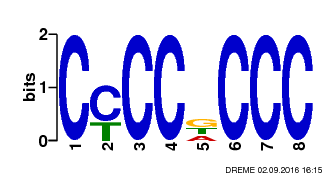 | 8.43 | 217.72 | 28.33 | 6.49 | 5.75 |
| **M5** | 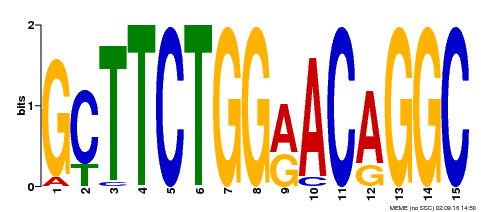 | 3.32 | 45.75 | 41.82 | ______ | 6.11 |
| **M6** | 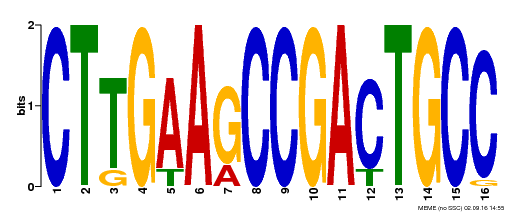 | 1.45 | 26.16 | 11.05 | ______ | 4.10 |
| **M7** | 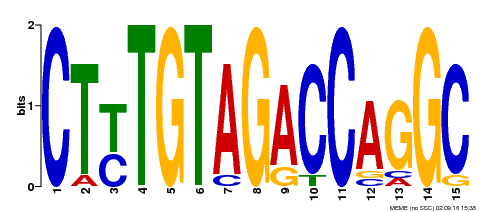 | 2.03 | 19.76 | 5.53 | ______ | 3.42 |
| **M8** | 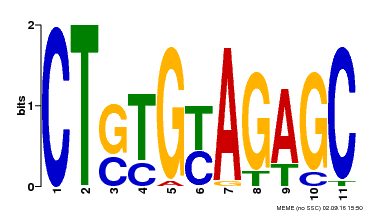 | 1.75 | 17.39 | 6.44 | ______ | 3.41 |
| **M9** | 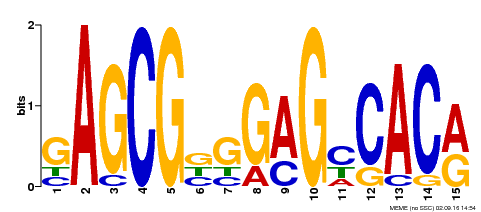 | 5.77 | 85.81 | 10.39 | ______ | ______ |
| **M10** | 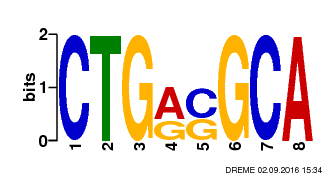 | 2.82 | 9.17 | 49.85 | ______ | ______ |
| **M11** | 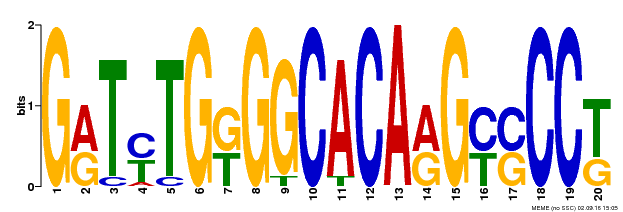 | 2.72 | 58.69 | 41.68 | ______ | ______ |
| **M12** | 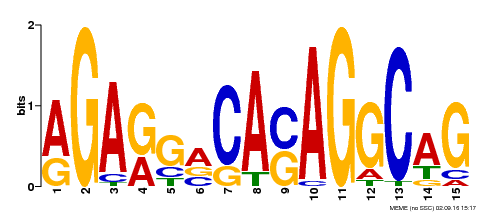 | 3.40 | 36.52 | 24.74 | ______ | ______ |
| **M13** | 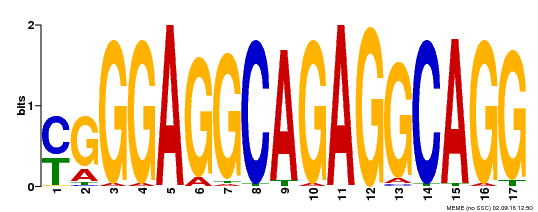 | 6.05 | 44.61 | 9.24 | ______ | ______ |
| **M14** | 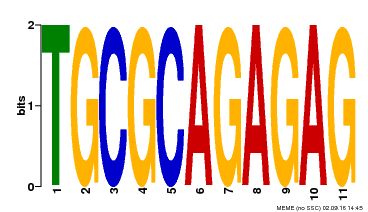 | 2.88 | 43.35 | 9.16 | ______ | ______ |
| **M15** | 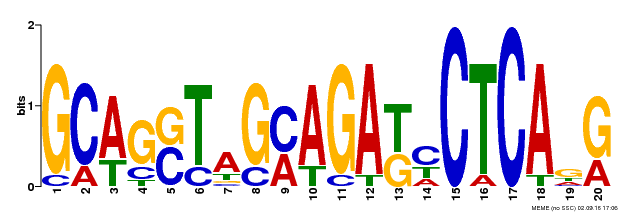 | 2.59 | 6.11 | 8.42 | ______ | ______ |
| **M16** | 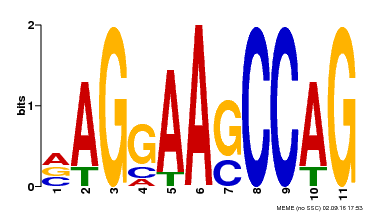 | 2.42 | 9.58 | 2.37 | ______ | ______ |
| **M17** | 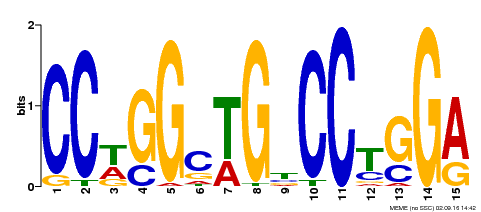 | ______ | 74.91 | 50.42 | 3.85 | 25.76 |
| **M18** | 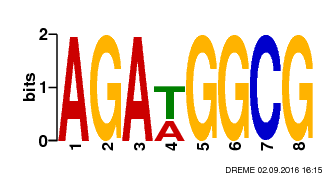 | ______ | 47.37 | 42.58 | ______ | 2.73 |
| **M19** | 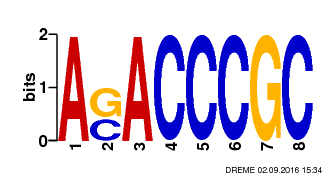 | ______ | 35.47 | 18.86 | ______ | 5.59 |
| **M20** | 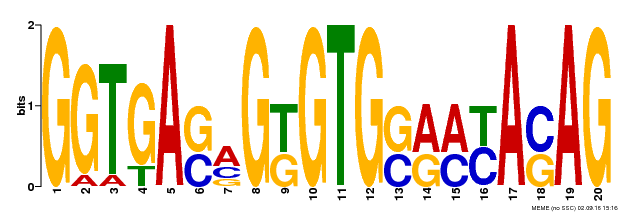 | ______ | 15.84 | 36.26 | ______ | ______ |
| **M21** | 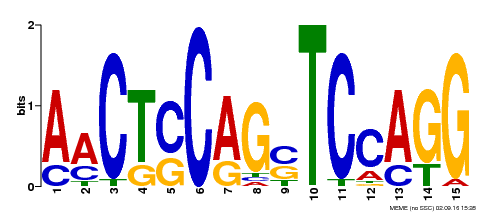 | ______ | 20.94 | 19.18 | ______ | ______ |
| **M22** | 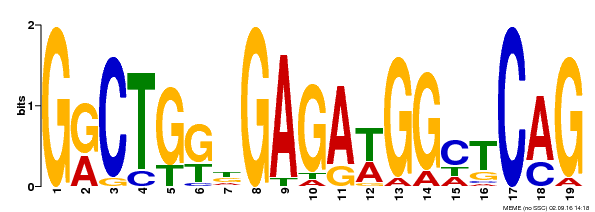 | ______ | 23.87 | 15.54 | ______ | ______ |
| **M23** | 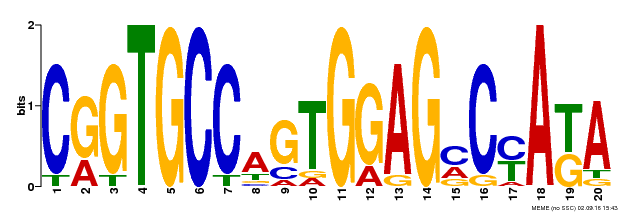 | ______ | 8.18 | 2.76 | ______ | ______ |
| **M24** | 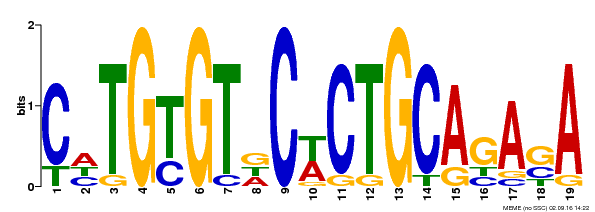 | ______ | 1.98 | 1.35 | ______ | ______ |
| **M25** | 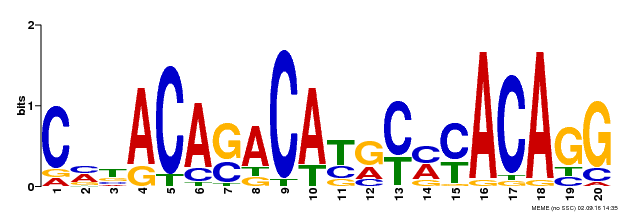 | ______ | ______ | 172.27 | ______ | ______ |
| **M26** | 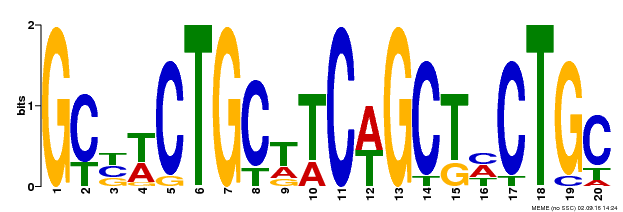 | ______ | ______ | 109.63 | ______ | ______ |
| **M27** | 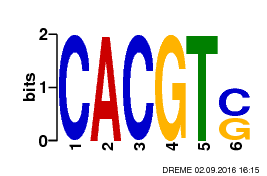 | ______ | ______ | 72.29 | ______ | ______ |
| **M28** | 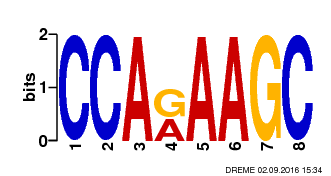 | ______ | ______ | 35.04 | ______ | ______ |
| **M29** | 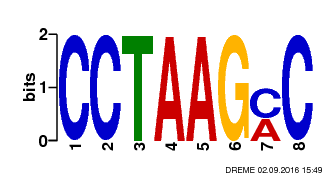 | ______ | ______ | 23.33 | ______ | ______ |
| **M30** | 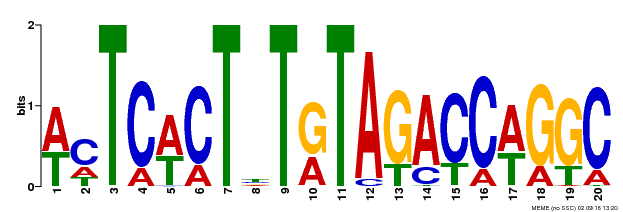 | ______ | ______ | 5.42 | ______ | ______ |
| **M31** | 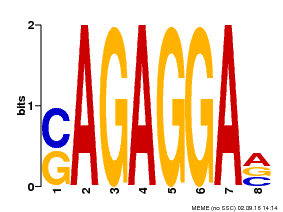 | ______ | ______ | 5.01 | ______ | ______ |
| **M32** | 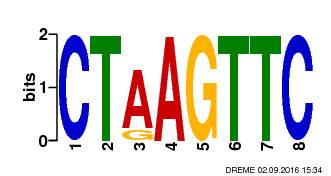 | ______ | ______ | 3.75 | ______ | ______ |
| **M33** | 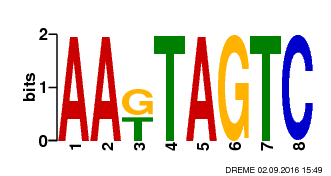 | ______ | ______ | 2.81 | ______ | ______ |
| **M34** | 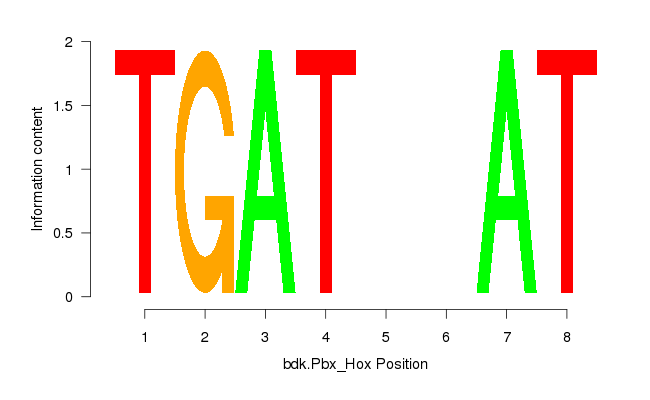 | ______ | ______ | 1.51 | ______ | ______ |
| **M35** | 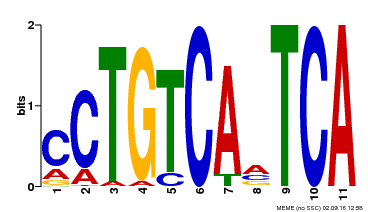 | 12.30 | 37.07 | ______ | ______ | ______ |
| **M36** | 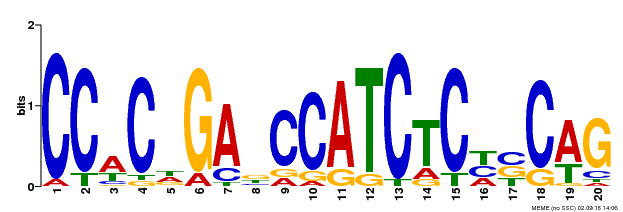 | 3.53 | 10.89 | ______ | ______ | ______ |
| **M37** | 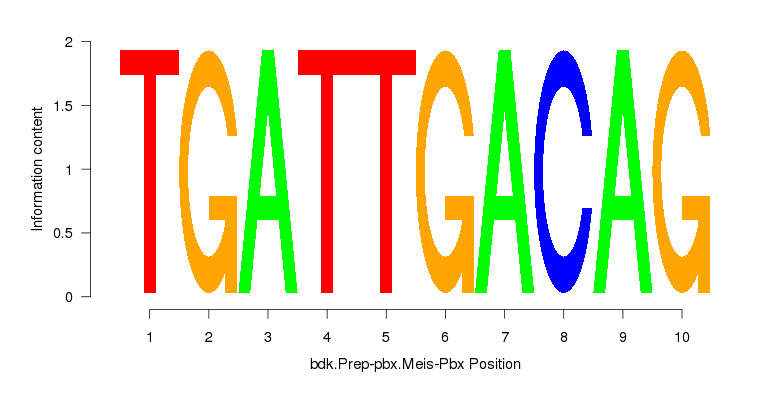 | 4.46 | 1.98 | ______ | ______ | ______ |
| **M38** | 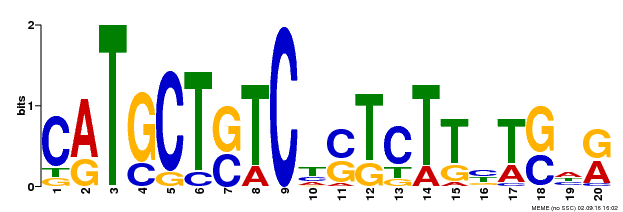 | 3.11 | 1.70 | ______ | ______ | ______ |
| **M39** | 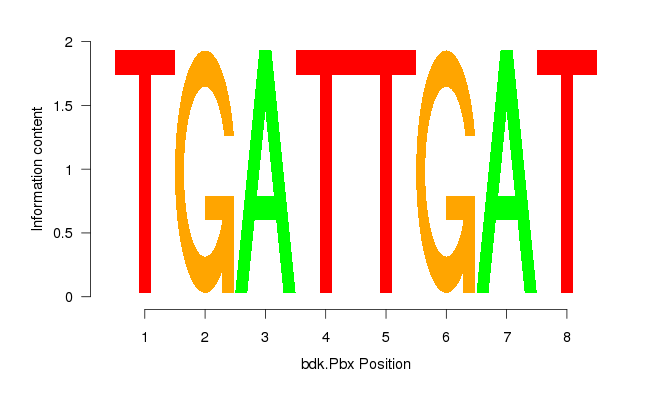 | 13.15 | ______ | ______ | ______ | ______ |
| **M40** | 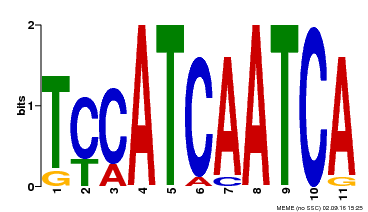 | 4.78 | ______ | ______ | ______ | ______ |
| **M41** | 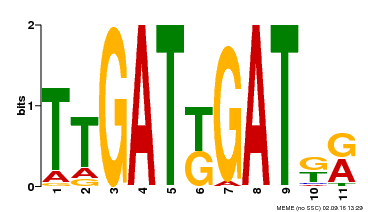 | 3.99 | ______ | ______ | ______ | ______ |
| **­M42** | 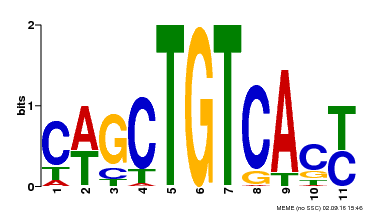 | 3.47 | ______ | ______ | ______ | ______ |

­­­

**Adjusted P-values as –log(10)**
