# Supplementary material for: HOXA1 and TALE proteins display cross-regulatory interactions and form a combinatorial binding code on HOXA1 targets
Source: HighWire-hosted journal article supplement (doi:10.1101/gr.219386.116), 2017-08-07
Supplement: Supplemental_Table_S10.docx [file Supplemental_Table_S10.docx]

**Supplemental Table S10.** Enriched motifs from various clusters of combinatorial binding of HOXA1 and TALE bound regions identified from ChIP-seq in differentiated cells.

**Cluster1**

| SN | Motifs | P-value | % of Targets | Best Match/Details |
| --- | --- | --- | --- | --- |
| **1** | **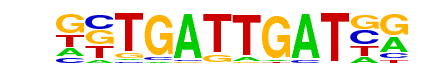** | 1.00E-23 | 12.18% | PBX1 |

**Cluster2**

| SN | Motifs | P-value | % of Targets | Best Match/Details |
| --- | --- | --- | --- | --- |
| **1** | **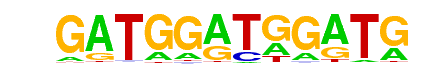** | 1.00E-234 | 27.56% | HOXA2 |
| **2** | **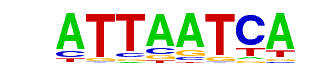** | 1.00E-88 | 44.59% | PDX1 |
| **3** | **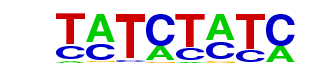** | 1.00E-80 | 27.85% | SIX6_2 |
| **4** | **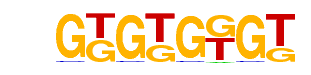** | 1.00E-31 | 20.15% | KLF1 |
| **5** | **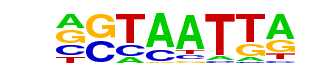** | 1.00E-21 | 13.63% | LHX2 |
| **6** | **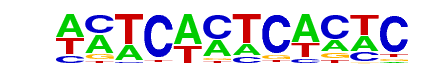** | 1.00E-20 | 6.37% | PBX1 |
| **7** | **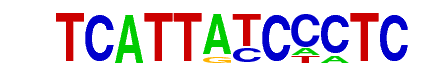** | 1.00E-18 | 1.33% | NKX6.1 |
| **8** | **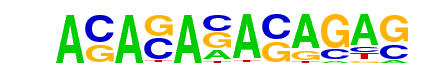** | 1.00E-17 | 10.07% | SOX12 |
| **9** | **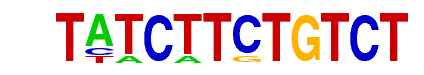** | 1.00E-12 | 1.19% | SMAD2 |

**Cluster 3**

| SN | Motifs | P-value | % of Targets | Best Match/Details |
| --- | --- | --- | --- | --- |
|  | **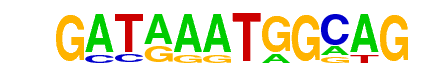** | 1.00E-28 | 7.58% | HOXB4 |
|  | **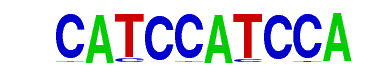** | 1.00E-22 | 4.89% | HOXA2 |
|  | **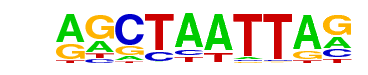** | 1.00E-13 | 18.34% | LHX2 |
|  | **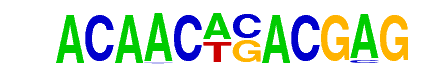** | 1.00E-12 | 1.22% | BRCA1 |
|  | **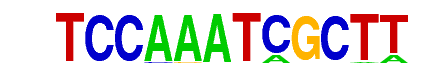** | 1.00E-12 | 1.22% | GFI1 |

| SN | Motifs | P-value | % of Targets | Best Match/Details |
| --- | --- | --- | --- | --- |
| 1 | 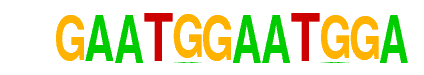 | 1.00E-38 | 3.65% | ZFP410 |
| 2 | 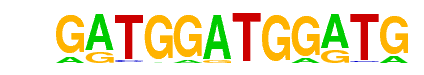 | 1.00E-22 | 4.87% | HOXA2 |
| 3 | 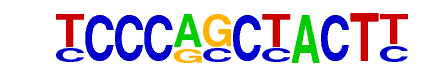 | 1.00E-20 | 2.43% | NKX3-2 |
| 4 | 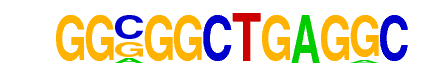 | 1.00E-16 | 2.92% | MAFB |
| 5 | 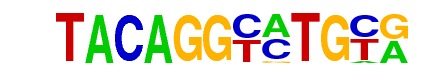 | 1.00E-14 | 2.68% | ZEB1 |
| 6 | 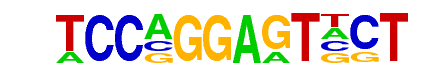 | 1.00E-12 | 1.95% | TEAD2(TEA)/PY2T-TEAD2 |

**Cluster 4**

**Cluster 5**

| SN | Motifs | P-value | % of Targets | Best Match/Details |
| --- | --- | --- | --- | --- |
| 1 | 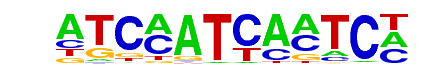 | 1.00E-25 | 12.23% | PDX1 |
| 2 | 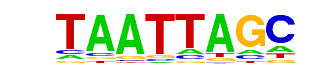 | 1.00E-14 | 28.46% | LHX2 |
| 3 | 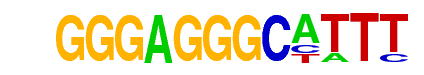 | 1.00E-12 | 1.33% | SOX13_2 |

**Cluster6**

| SN | Motifs | P-value | % of Targets | Best Match/Details |
| --- | --- | --- | --- | --- |
|  | **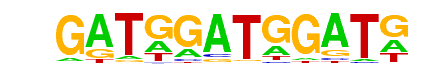** | 1.00E-17 | 3.86% | HOXA2 |

**Cluster7**

| SN | Motifs | P-value | % of Targets | Best Match/Details |
| --- | --- | --- | --- | --- |
|  |  |  |  |  |
| **1** | **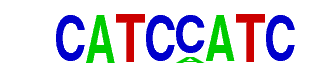** | 1.00E-97 | 29.23% | HOXA2 |
| **2** | **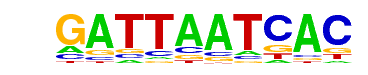** | 1.00E-34 | 26.68% | PDX1 |
| **3** | **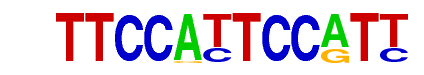** | 1.00E-26 | 2.55% | NFAT |
| **4** | **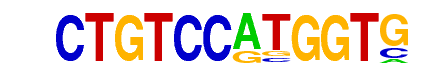** | 1.00E-17 | 3.02% | REST |
| **5** | **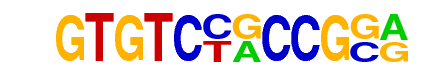** | 1.00E-15 | 1.62% | GM397_2 |
| **6** | **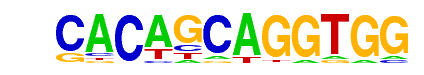** | 1.00E-14 | 4.64% | Unknown-ESC-element |
| **7** | **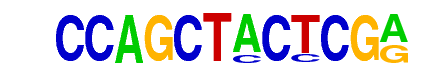** | 1.00E-14 | 1.39% | TCF3 |
| **8** | **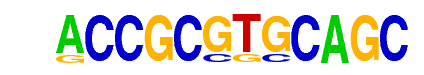** | 1.00E-14 | 1.39% | MTF1_1 |
| **9** | **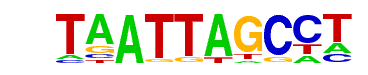** | 1.00E-14 | 6.50% | LHX2 |
| **10** | **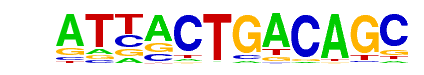** | 1.00E-14 | 4.64% | MEIS1 |
| **11** | **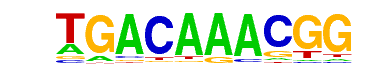** | 1.00E-13 | 8.58% | SOX3 |
| **12** | **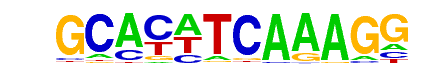** | 1.00E-12 | 5.80% | TCF3(HMG) |
| **13** | **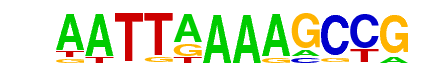** | 1.00E-12 | 2.09% | ARID3A |
| **14** | **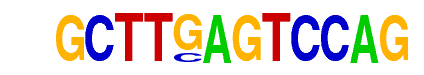** | 1.00E-12 | 1.16% | HNF4A |
| **15** | **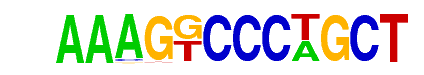** | 1.00E-12 | 1.16% | HNF4A |

**Cluster 8**

| SN | Motifs | P-value | % of Targets | Best Match/Details |
| --- | --- | --- | --- | --- |
| 1 | 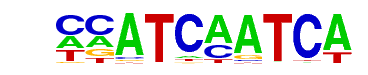 | 1.00E-213 | 49.37% | HOXA2 |
| 2 | 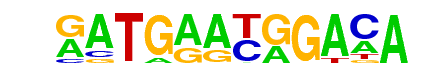 | 1.00E-30 | 7.52% | NFAT |
| 3 | 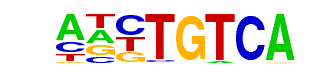 | 1.00E-23 | 37.62% | MEIS1 |
| 4 | 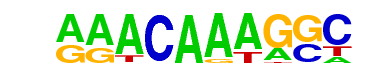 | 1.00E-20 | 7.52% | SOX3 |
| 5 | 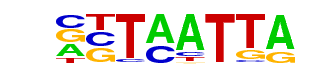 | 1.00E-20 | 14.11% | LHX2 |
| 6 | 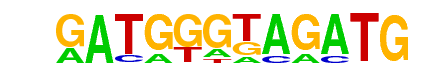 | 1.00E-18 | 4.08% | GATA3(ZF) |
| 7 | 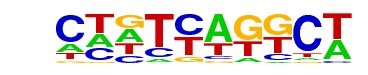 | 1.00E-13 | 7.05% | MEIS1 |
| 8 | 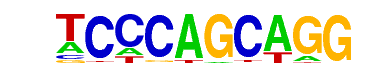 | 1.00E-12 | 5.96% | Unknown-ESC-element |
