# Supplementary material for: HOXA1 and TALE proteins display cross-regulatory interactions and form a combinatorial binding code on HOXA1 targets
Source: HighWire-hosted journal article supplement (doi:10.1101/gr.219386.116), 2017-08-07
Supplement: Supplemental_Table_S11.docx [file Supplemental_Table_S11.docx]

**Details of transgenic fish experiment in Zebra fish**

|  |  | Hindbrain | | | | Other domain of expression | | |
| --- | --- | --- | --- | --- | --- | --- | --- | --- |
| Near by gene Gene | Coordinates (mm10) | Expression domain | # embryos | # expression | % expression | Other expression domain | # expression | %  expression |
| Pbx1 | chr1:168,402,425-168,403,268 | CNS | 143 | 115 | 80.4 |  |  |  |
| Pbx3 | chr2:34,288,589-34,289,594 | hindbrain | 78 | 39 | 50.0 |  |  |  |
| Pbx3 | chr2:34,101,356-34,102,169 | hindbrain | 230 | 118 | 51.3 |  |  |  |
| Pbx3 | chr2:34,112,169-34,113,479 | hindbrain | 171 | 43 | 25.1 |  |  |  |
| Meis1 | chr11:18873758-18875373 | hindbrain | 124 | 58 | 46.8 |  |  |  |
| Meis1 | chr11:18982666-18983842 | hindbrain and spinal cord | 237 | 99 | 41.8 |  |  |  |
| Meis2 | chr2:116,065,326-116,066,275 | hindbrain | 108 | 37 | 34.3 | forebrain |  |  |
| Meis2 | chr2:115858968-115860769 | hindbrain | 189 | 126 | 66.7 | forebrain | 151 | 79.9 |
| Meis3 | chr7:16171955-16172,978 | none | N/A | N/A | N/A |  |  |  |
| Meis3 | chr7:16183398-16184724 | none | N/A | N/A | N/A |  |  |  |
| Tgif2 | chr2:156840779-156842093 | hindbrain | 113 | 63 | 55.8 | forebrain | 61 | 54.0 |
| Meis2 | chr2:116067096-116068084 | hindbrain | 117 | 84 | 71.8 | forebrain | 69 | 59.0 |
| Meis2 downstream MutHox-Pbx1&2 | chr2:116067096-116068084 | hindbrain | 120 | 82 | 68.3 | forebrain | 112 | 93.3 |
| Meis3 | chr2:115856008-115858033 | hindbrain | 210 | 194 | 92.4 | forebrain | 171 | 81.4 |
| Meis3 upstream Mut HoxPbx | chr2:115856008-115858033 | hindbrain | 101 | 48 | 47.5 | forebrain | 79 | 78.2 |
| Meis3 upstream Mut TGIF1&2 | chr2:115856008-115858033 | hindbrain | 138 | 95 | 68.8 | forebrain | not counted | N/A |
